# Supplementary material for: A performance evaluation of drug response prediction models for individual drugs
Source: Springer Nature journal article supplement (doi:10.1038/s41598-023-39179-2), 2023-07-24
Supplement: MOESM1 [file 41598_2023_39179_MOESM1_ESM.pdf]

**A performance evaluation of drug response prediction models for  
individual drugs**

Park *et al.*

**Supplementary Information**

Supplementary Method S1.

Supplementary Tables S1 through S25

Supplementary Figures S1 through S22

Supplementary References

### **Supplementary Method S1. Raw data description**

The mutation profile was downloaded from GDSC (Release-7.0; last modified on Mar 20, 2018) <sup>1</sup>, and the profile is in ENSEMBL annotation version 56 ([ftp://ftp.sanger.ac.uk/pub4/cancerrxgene/releases/release-7.0/WES\\_variants.xlsx](ftp://ftp.sanger.ac.uk/pub4/cancerrxgene/releases/release-7.0/WES_variants.xlsx)). The expression profile was obtained from Cancer Cell Line Encyclopedia (CCLE) <sup>2</sup>, uploaded on Oct 17, 2012 ([https://data.broadinstitute.org/ccle\\_legacy\\_data/mRNA\\_expression/CCLE\\_Expression\\_Entrez\\_2012-09-29.gct](https://data.broadinstitute.org/ccle_legacy_data/mRNA_expression/CCLE_Expression_Entrez_2012-09-29.gct)). Drug response measurement (IC<sub>50</sub>) data from CCLE (Released on Feb 24, 2015) were downloaded via [https://data.broadinstitute.org/ccle\\_legacy\\_data/pharmacological\\_profiling/CCLE\\_NP24.2009\\_Drug\\_data\\_2015.02.24.csv](https://data.broadinstitute.org/ccle_legacy_data/pharmacological_profiling/CCLE_NP24.2009_Drug_data_2015.02.24.csv).

Gene expression data of gastric cancer cell lines from GDSC was downloaded via the GDSC1000 resource ([https://www.cancerrxgene.org/gdsc1000/GDSC1000\\_WebResources//Data/reprocessed/Cell\\_line\\_RMA\\_proc\\_basalExp.txt.zip](https://www.cancerrxgene.org/gdsc1000/GDSC1000_WebResources//Data/reprocessed/Cell_line_RMA_proc_basalExp.txt.zip)).

**Supplementary Table S1. Description of datasets. We set various combinations of dataset size and genomic information and nominally assigned each combination to a dataset name (first column).**

| <b>Dataset names</b> | <b>Input of genomics information</b> | <b>Genomics vector length</b> | <b>Output (observed cell viability)</b> | <b>Dataset size</b> |
|----------------------|--------------------------------------|-------------------------------|-----------------------------------------|---------------------|
| EC-11K               | Expression (CCLE)                    | 18,988 (genes)                | ln(IC50)s from CCLE                     | 11,360              |
| MC-9K                | Mutation (GDSC)                      | 21,213 (mutation positions)   | ln(IC50)s from CCLE                     | 8,727               |

**Supplementary Table S2. The number of samples in the training and test sets for the models of 24 individual drugs in setting 1.**

| <b>Drug</b>  | <b>Samples for training</b> | <b>Samples for test</b> |
|--------------|-----------------------------|-------------------------|
| AEW541       | 392                         | 98                      |
| Nilotinib    | 326                         | 81                      |
| 17-AAG       | 392                         | 98                      |
| PHA-665752   | 392                         | 98                      |
| Lapatinib    | 393                         | 98                      |
| Nutlin-3     | 393                         | 98                      |
| AZD0530      | 393                         | 98                      |
| PF2341066    | 393                         | 98                      |
| L-685458     | 383                         | 95                      |
| ZD-6474      | 387                         | 96                      |
| Panobinostat | 390                         | 97                      |
| Sorafenib    | 392                         | 98                      |
| Irinotecan   | 245                         | 61                      |
| Topotecan    | 393                         | 98                      |
| LBW242       | 392                         | 98                      |
| PD-0325901   | 393                         | 98                      |
| PD-0332991   | 337                         | 84                      |
| Paclitaxel   | 392                         | 98                      |
| PLX4720      | 387                         | 96                      |
| RAF265       | 358                         | 89                      |
| TAE684       | 393                         | 98                      |
| TKI258       | 392                         | 98                      |
| Erlotinib    | 392                         | 98                      |
| AZD6244      | 392                         | 98                      |

**Supplementary Table S3. The number of samples in the training and test sets for the models of 24 individual drugs in setting 2.**

| Drug         | Samples for training | Samples for test |
|--------------|----------------------|------------------|
| AEW541       | 303                  | 75               |
| Nilotinib    | 248                  | 61               |
| 17-AAG       | 302                  | 75               |
| PHA-665752   | 302                  | 75               |
| Lapatinib    | 303                  | 75               |
| Nutlin-3     | 303                  | 75               |
| AZD0530      | 303                  | 75               |
| PF2341066    | 303                  | 75               |
| L-685458     | 292                  | 73               |
| ZD-6474      | 298                  | 74               |
| Panobinostat | 300                  | 75               |
| Sorafenib    | 302                  | 75               |
| Irinotecan   | 183                  | 45               |
| Topotecan    | 303                  | 75               |
| LBW242       | 302                  | 75               |
| PD-0325901   | 303                  | 75               |
| PD-0332991   | 258                  | 64               |
| Paclitaxel   | 302                  | 75               |
| PLX4720      | 298                  | 74               |
| RAF265       | 274                  | 68               |
| TAE684       | 303                  | 75               |
| TKI258       | 303                  | 75               |
| Erlotinib    | 303                  | 75               |
| AZD6244      | 302                  | 75               |

**Supplementary Table S4. Performance of the models for 24 individual drugs in setting 1, using Lasso.**

| <b>Drug</b>  | <b>RMSE</b> | <b>R<sup>2</sup></b> |
|--------------|-------------|----------------------|
| PD-0325901   | 1.716       | 0.345                |
| Panobinostat | 0.729       | 0.275                |
| AZD6244      | 1.276       | 0.216                |
| Topotecan    | 1.355       | 0.200                |
| PLX4720      | 0.609       | 0.176                |
| PF2341066    | 0.616       | 0.137                |
| 17-AAG       | 1.266       | 0.130                |
| Irinotecan   | 1.180       | 0.106                |
| RAF265       | 1.206       | 0.099                |
| Paclitaxel   | 2.196       | 0.071                |
| L-685458     | 0.724       | 0.063                |
| Lapatinib    | 0.803       | 0.059                |
| ZD-6474      | 0.799       | 0.002                |
| PD-0332991   | 0.617       | 0.000                |
| Nutlin-3     | 0.811       | -0.039               |
| TAE684       | 1.400       | -0.046               |
| PHA-665752   | 0.880       | -0.101               |
| AEW541       | 0.920       | -0.333               |
| TKI258       | 0.806       | -0.341               |
| Sorafenib    | 0.850       | -0.448               |
| AZD0530      | 0.866       | -0.495               |
| Nilotinib    | 0.698       | -0.620               |
| Erlotinib    | 0.719       | -0.688               |
| LBW242       | 0.645       | -4.864               |

R<sup>2</sup>, R-squared value; RMSE, root mean squared error.

**Supplementary Table S5. Performance of the models for 24 individual drugs in setting 1, using ridge.**

| <b>Drug</b>  | <b>RMSE</b> | <b>R<sup>2</sup></b> |
|--------------|-------------|----------------------|
| PD-0325901   | 1.632       | 0.408                |
| Panobinostat | 0.623       | 0.470                |
| AZD6244      | 1.137       | 0.378                |
| Topotecan    | 1.298       | 0.266                |
| PLX4720      | 0.577       | 0.260                |
| PF2341066    | 0.604       | 0.169                |
| 17-AAG       | 1.249       | 0.153                |
| Irinotecan   | 1.201       | 0.075                |
| RAF265       | 1.067       | 0.294                |
| Paclitaxel   | 2.282       | -0.004               |
| L-685458     | 0.672       | 0.194                |
| Lapatinib    | 0.652       | 0.379                |
| ZD-6474      | 0.777       | 0.056                |
| PD-0332991   | 0.529       | 0.265                |
| Nutlin-3     | 0.804       | -0.022               |
| TAE684       | 1.223       | 0.202                |
| PHA-665752   | 0.851       | -0.027               |
| AEW541       | 0.827       | -0.078               |
| TKI258       | 0.700       | -0.010               |
| Sorafenib    | 0.786       | -0.238               |
| AZD0530      | 0.798       | -0.271               |
| Nilotinib    | 0.682       | -0.545               |
| Erlotinib    | 0.624       | -0.270               |
| LBW242       | 0.472       | -2.144               |

R<sup>2</sup>, R-squared value; RMSE, root mean squared error.

**Supplementary Table S6. Performance of the models for 24 individual drugs in setting 1, using SVR.**

| <b>Drug</b>  | <b>RMSE</b> | <b>R<sup>2</sup></b> |
|--------------|-------------|----------------------|
| PD-0325901   | 2.564       | -0.462               |
| Panobinostat | 0.837       | 0.043                |
| AZD6244      | 1.559       | -0.170               |
| Topotecan    | 1.513       | 0.002                |
| PLX4720      | 0.676       | -0.015               |
| PF2341066    | 0.684       | -0.066               |
| 17-AAG       | 1.374       | -0.025               |
| Irinotecan   | 1.245       | 0.006                |
| RAF265       | 1.337       | -0.107               |
| Paclitaxel   | 2.356       | -0.070               |
| L-685458     | 0.762       | -0.038               |
| Lapatinib    | 0.883       | -0.138               |
| ZD-6474      | 0.872       | -0.187               |
| PD-0332991   | 0.623       | -0.018               |
| Nutlin-3     | 0.796       | 0.000                |
| TAE684       | 1.386       | -0.026               |
| PHA-665752   | 0.845       | -0.015               |
| AEW541       | 0.861       | -0.167               |
| TKI258       | 0.783       | -0.265               |
| Sorafenib    | 0.711       | -0.014               |
| AZD0530      | 0.737       | -0.082               |
| Nilotinib    | 0.553       | -0.015               |
| Erlotinib    | 0.562       | -0.032               |
| LBW242       | 0.274       | -0.057               |

R<sup>2</sup>, R-squared value; RMSE, root mean squared error.



**Supplementary Table S7. Performance of the models for 24 individual drugs in setting 1, using random forest.**

| <b>Drug</b>  | <b>RMSE</b> | <b>R<sup>2</sup></b> |
|--------------|-------------|----------------------|
| PD-0325901   | 1.664       | 0.384                |
| Panobinostat | 0.644       | 0.434                |
| AZD6244      | 1.176       | 0.334                |
| Topotecan    | 1.226       | 0.345                |
| PLX4720      | 0.620       | 0.144                |
| PF2341066    | 0.572       | 0.254                |
| 17-AAG       | 1.159       | 0.270                |
| Irinotecan   | 0.995       | 0.365                |
| RAF265       | 1.203       | 0.104                |
| Paclitaxel   | 2.140       | 0.118                |
| L-685458     | 0.678       | 0.178                |
| Lapatinib    | 0.714       | 0.257                |
| ZD-6474      | 0.748       | 0.125                |
| PD-0332991   | 0.502       | 0.338                |
| Nutlin-3     | 0.798       | -0.006               |
| TAE684       | 1.245       | 0.173                |
| PHA-665752   | 0.836       | 0.008                |
| AEW541       | 0.808       | -0.028               |
| TKI258       | 0.621       | 0.206                |
| Sorafenib    | 0.720       | -0.041               |
| AZD0530      | 0.706       | 0.005                |
| Nilotinib    | 0.601       | -0.199               |
| Erlotinib    | 0.520       | 0.115                |
| LBW242       | 0.451       | -1.870               |

R<sup>2</sup>, R-squared value; RMSE, root mean squared error.

**Supplementary Table S8. Performance of the models for 24 individual drugs in setting 1, using XGBoost.**

| <b>Drug</b>  | <b>RMSE</b> | <b>R<sup>2</sup></b> |
|--------------|-------------|----------------------|
| PD-0325901   | 1.894       | 0.202                |
| Panobinostat | 0.710       | 0.311                |
| AZD6244      | 1.279       | 0.213                |
| Topotecan    | 1.378       | 0.172                |
| PLX4720      | 0.697       | -0.081               |
| PF2341066    | 0.666       | -0.009               |
| 17-AAG       | 1.340       | 0.024                |
| Irinotecan   | 1.080       | 0.251                |
| RAF265       | 1.249       | 0.032                |
| Paclitaxel   | 2.131       | 0.125                |
| L-685458     | 0.663       | 0.214                |
| Lapatinib    | 0.705       | 0.274                |
| ZD-6474      | 0.767       | 0.081                |
| PD-0332991   | 0.523       | 0.283                |
| Nutlin-3     | 0.802       | -0.017               |
| TAE684       | 1.292       | 0.108                |
| PHA-665752   | 0.821       | 0.043                |
| AEW541       | 0.840       | -0.112               |
| TKI258       | 0.722       | -0.076               |
| Sorafenib    | 0.718       | -0.034               |
| AZD0530      | 0.736       | -0.079               |
| Nilotinib    | 0.741       | -0.822               |
| Erlotinib    | 0.617       | -0.243               |
| LBW242       | 0.804       | -8.113               |

R<sup>2</sup>, R-squared value; RMSE, root mean squared error.

**Supplementary Table S9. Performance of the models for 24 individual drugs in setting 1, using ElasticNet.**

| <b>Drug</b>  | <b>RMSE</b> | <b>R<sup>2</sup></b> |
|--------------|-------------|----------------------|
| PD-0325901   | 1.655       | 0.391                |
| Panobinostat | 0.715       | 0.302                |
| Irinotecan   | 1.153       | 0.147                |
| Topotecan    | 1.299       | 0.265                |
| AZD6244      | 1.209       | 0.296                |
| PLX4720      | 0.573       | 0.269                |
| PD-0332991   | 0.626       | -0.030               |
| TKI258       | 0.781       | -0.258               |
| Lapatinib    | 0.776       | 0.121                |
| TAE684       | 1.393       | -0.036               |
| AZD0530      | 0.830       | -0.375               |
| L-685458     | 0.726       | 0.057                |
| PF2341066    | 0.612       | 0.147                |
| 17-AAG       | 1.273       | 0.120                |
| RAF265       | 1.185       | 0.130                |
| AEW541       | 0.907       | -0.296               |
| Nilotinib    | 0.700       | -0.630               |
| Nutlin-3     | 0.811       | -0.038               |
| ZD-6474      | 0.818       | -0.046               |
| Erlotinib    | 0.696       | -0.582               |
| PHA-665752   | 0.881       | -0.103               |
| Sorafenib    | 0.840       | -0.416               |
| Paclitaxel   | 2.238       | 0.035                |
| LBW242       | 0.628       | -4.556               |

R<sup>2</sup>, R-squared value; RMSE, root mean squared error.

**Supplementary Table S10. Performance of the models for 24 individual drugs in setting 1, using ResNet.**

| <b>Drug</b>  | <b>RMSE</b> | <b>R<sup>2</sup></b> |
|--------------|-------------|----------------------|
| PD-0325901   | 2.214       | -0.091               |
| Panobinostat | 1.121       | -0.716               |
| AZD6244      | 1.502       | -0.086               |
| Topotecan    | 1.560       | -0.060               |
| PLX4720      | 0.750       | -0.251               |
| PF2341066    | 0.667       | -0.011               |
| 17-AAG       | 1.367       | -0.015               |
| Irinotecan   | 1.344       | -0.159               |
| RAF265       | 1.307       | -0.059               |
| Paclitaxel   | 3.563       | -1.446               |
| L-685458     | 0.785       | -0.102               |
| Lapatinib    | 0.952       | -0.322               |
| ZD-6474      | 0.819       | -0.049               |
| PD-0332991   | 0.692       | -0.257               |
| Nutlin-3     | 0.797       | -0.003               |
| TAE684       | 1.424       | -0.082               |
| PHA-665752   | 0.897       | -0.142               |
| AEW541       | 0.930       | -0.363               |
| TKI258       | 0.824       | -0.398               |
| Sorafenib    | 0.798       | -0.277               |
| AZD0530      | 0.781       | -0.215               |
| Nilotinib    | 0.578       | -0.109               |
| Erlotinib    | 0.643       | -0.352               |
| LBW242       | 0.517       | -2.763               |

R<sup>2</sup>, R-squared value; RMSE, root mean squared error.

**Supplementary Table S11. Performance of the models for 24 individual drugs in setting 1, using CNN.**

| <b>Drug</b>  | <b>RMSE</b> | <b>R<sup>2</sup></b> |
|--------------|-------------|----------------------|
| PD-0325901   | 1.734       | 0.331                |
| Panobinostat | 0.709       | 0.314                |
| AZD6244      | 1.288       | 0.201                |
| Topotecan    | 1.337       | 0.222                |
| PLX4720      | 0.609       | 0.176                |
| PF2341066    | 0.640       | 0.067                |
| 17-AAG       | 1.312       | 0.065                |
| Irinotecan   | 1.092       | 0.235                |
| RAF265       | 1.236       | 0.054                |
| Paclitaxel   | 2.404       | -0.114               |
| L-685458     | 0.715       | 0.086                |
| Lapatinib    | 0.776       | 0.122                |
| ZD-6474      | 0.811       | -0.027               |
| PD-0332991   | 0.561       | 0.175                |
| Nutlin-3     | 0.797       | -0.003               |
| TAE684       | 1.292       | 0.109                |
| PHA-665752   | 0.855       | -0.038               |
| AEW541       | 0.784       | 0.031                |
| TKI258       | 0.645       | 0.143                |
| Sorafenib    | 0.723       | -0.047               |
| AZD0530      | 0.676       | 0.088                |
| Nilotinib    | 0.546       | 0.011                |
| Erlotinib    | 0.563       | -0.034               |
| LBW242       | 0.284       | -0.133               |

R<sup>2</sup>, R-squared value; RMSE, root mean squared error.

**Supplementary Table S12. Performance of the models for 24 individual drugs in setting 2, using Lasso.**

| <b>Drug</b>  | <b>RMSE</b> | <b>R<sup>2</sup></b> |
|--------------|-------------|----------------------|
| Nilotinib    | 0.769       | 0.393                |
| PHA-665752   | 0.365       | -0.093               |
| AZD6244      | 1.595       | -0.008               |
| PD-0325901   | 2.359       | -0.137               |
| Panobinostat | 0.833       | -0.015               |
| Nutlin-3     | 0.852       | -0.023               |
| PD-0332991   | 0.543       | -0.065               |
| Paclitaxel   | 2.110       | -0.129               |
| LBW242       | 0.875       | -0.111               |
| ZD-6474      | 0.920       | -0.160               |
| Irinotecan   | 1.484       | -0.252               |
| TAE684       | 1.237       | -0.181               |
| RAF265       | 1.220       | -0.129               |
| AEW541       | 0.956       | -0.246               |
| L-685458     | 0.810       | -0.154               |
| AZD0530      | 0.969       | -0.217               |
| Topotecan    | 1.714       | -0.267               |
| 17-AAG       | 1.972       | -0.328               |
| Erlotinib    | 0.749       | -0.255               |
| TKI258       | 0.653       | -0.261               |
| PF2341066    | 0.798       | -0.385               |
| Lapatinib    | 0.696       | -0.195               |
| Sorafenib    | 0.459       | -0.319               |
| PLX4720      | 0.521       | -1.417               |

R<sup>2</sup>, R-squared value; RMSE, root mean squared error.

**Supplementary Table S13. Performance of the models for 24 individual drugs in setting 2, using ridge.**

| <b>Drug</b>  | <b>RMSE</b> | <b>R<sup>2</sup></b> |
|--------------|-------------|----------------------|
| Nilotinib    | 0.969       | 0.038                |
| PHA-665752   | 0.346       | 0.015                |
| AZD6244      | 1.500       | 0.107                |
| PD-0325901   | 2.291       | -0.073               |
| Panobinostat | 0.894       | -0.167               |
| Nutlin-3     | 0.853       | -0.025               |
| PD-0332991   | 1.457       | -6.660               |
| Paclitaxel   | 2.321       | -0.366               |
| LBW242       | 0.857       | -0.068               |
| ZD-6474      | 0.855       | -0.002               |
| Irinotecan   | 1.858       | -0.963               |
| TAE684       | 1.133       | 0.009                |
| RAF265       | 1.960       | -1.914               |
| AEW541       | 0.844       | 0.029                |
| L-685458     | 1.158       | -1.358               |
| AZD0530      | 0.882       | -0.009               |
| Topotecan    | 2.010       | -0.743               |
| 17-AAG       | 1.801       | -0.108               |
| Erlotinib    | 0.957       | -1.049               |
| TKI258       | 0.811       | -0.943               |
| PF2341066    | 0.811       | -0.429               |
| Lapatinib    | 1.154       | -2.289               |
| Sorafenib    | 0.426       | -0.137               |
| PLX4720      | 0.779       | -4.397               |

R<sup>2</sup>, R-squared value; RMSE, root mean squared error.

**Supplementary Table S14. Performance of the models for 24 individual drugs in setting 2, using random forest.**

| <b>Drug</b>  | <b>RMSE</b> | <b>R<sup>2</sup></b> |
|--------------|-------------|----------------------|
| Nilotinib    | 0.808       | 0.330                |
| PHA-665752   | 0.354       | -0.028               |
| AZD6244      | 1.490       | 0.119                |
| PD-0325901   | 2.188       | 0.021                |
| Panobinostat | 0.836       | -0.022               |
| Nutlin-3     | 0.853       | -0.024               |
| PD-0332991   | 1.097       | -3.343               |
| Paclitaxel   | 2.342       | -0.391               |
| LBW242       | 0.853       | -0.056               |
| ZD-6474      | 0.879       | -0.058               |
| Irinotecan   | 1.781       | -0.803               |
| TAE684       | 1.183       | -0.081               |
| RAF265       | 1.360       | -0.404               |
| AEW541       | 0.893       | -0.087               |
| L-685458     | 1.090       | -1.089               |
| AZD0530      | 0.907       | -0.068               |
| Topotecan    | 2.061       | -0.832               |
| 17-AAG       | 1.822       | -0.134               |
| Erlotinib    | 0.788       | -0.390               |
| TKI258       | 0.804       | -0.910               |
| PF2341066    | 0.690       | -0.033               |
| Lapatinib    | 1.027       | -1.603               |
| Sorafenib    | 0.422       | -0.115               |
| PLX4720      | 0.748       | -3.972               |

R<sup>2</sup>, R-squared value; RMSE, root mean squared error.



**Supplementary Table S15. Performance of the models for 24 individual drugs in setting 2, using SVR.**

| <b>Drug</b>  | <b>RMSE</b> | <b>R<sup>2</sup></b> |
|--------------|-------------|----------------------|
| Nilotinib    | 1.019       | -0.065               |
| PHA-665752   | 0.349       | 0.000                |
| AZD6244      | 1.742       | -0.203               |
| PD-0325901   | 2.697       | -0.486               |
| Panobinostat | 0.828       | -0.002               |
| Nutlin-3     | 0.843       | -0.002               |
| PD-0332991   | 0.531       | -0.017               |
| Paclitaxel   | 2.002       | -0.017               |
| LBW242       | 0.835       | -0.013               |
| ZD-6474      | 0.924       | -0.169               |
| Irinotecan   | 1.330       | -0.005               |
| TAE684       | 1.193       | -0.099               |
| RAF265       | 1.222       | -0.134               |
| AEW541       | 1.003       | -0.371               |
| L-685458     | 0.762       | -0.021               |
| AZD0530      | 0.951       | -0.173               |
| Topotecan    | 1.534       | -0.014               |
| 17-AAG       | 1.723       | -0.014               |
| Erlotinib    | 0.681       | -0.039               |
| TKI258       | 0.672       | -0.335               |
| PF2341066    | 0.750       | -0.224               |
| Lapatinib    | 0.663       | -0.086               |
| Sorafenib    | 0.406       | -0.035               |
| PLX4720      | 0.336       | -0.005               |

R<sup>2</sup>, R-squared value; RMSE, root mean squared error.

**Supplementary Table S16. Performance of the models for 24 individual drugs in setting 2, using XGBoost.**

| <b>Drug</b>  | <b>RMSE</b> | <b>R<sup>2</sup></b> |
|--------------|-------------|----------------------|
| Nilotinib    | 0.772       | 0.389                |
| PHA-665752   | 0.323       | 0.146                |
| AZD6244      | 1.475       | 0.138                |
| PD-0325901   | 2.159       | 0.047                |
| Panobinostat | 0.822       | 0.012                |
| Nutlin-3     | 0.856       | -0.032               |
| PD-0332991   | 0.538       | -0.042               |
| Paclitaxel   | 2.124       | -0.145               |
| LBW242       | 0.891       | -0.154               |
| ZD-6474      | 0.926       | -0.175               |
| Irinotecan   | 1.446       | -0.188               |
| TAE684       | 1.245       | -0.197               |
| RAF265       | 1.256       | -0.198               |
| AEW541       | 0.941       | -0.207               |
| L-685458     | 0.830       | -0.212               |
| AZD0530      | 0.982       | -0.251               |
| Topotecan    | 1.706       | -0.255               |
| 17-AAG       | 1.934       | -0.277               |
| Erlotinib    | 0.783       | -0.372               |
| TKI258       | 0.691       | -0.413               |
| PF2341066    | 0.808       | -0.418               |
| Lapatinib    | 0.779       | -0.500               |
| Sorafenib    | 0.503       | -0.588               |
| PLX4720      | 0.562       | -1.809               |

R<sup>2</sup>, R-squared value; RMSE, root mean squared error.

**Supplementary Table S17. Performance of the models for 24 individual drugs in setting 2, using ElasticNet.**

| <b>Drug</b>  | <b>RMSE</b> | <b>R<sup>2</sup></b> |
|--------------|-------------|----------------------|
| Nilotinib    | 0.888       | 0.192                |
| PHA-665752   | 0.330       | 0.106                |
| AZD6244      | 1.766       | -0.237               |
| PD-0325901   | 2.437       | -0.214               |
| Panobinostat | 0.817       | 0.025                |
| Nutlin-3     | 0.854       | -0.027               |
| PD-0332991   | 0.911       | -1.994               |
| Paclitaxel   | 2.240       | -0.272               |
| LBW242       | 0.958       | -0.334               |
| ZD-6474      | 0.947       | -0.228               |
| Irinotecan   | 1.736       | -0.714               |
| TAE684       | 1.210       | -0.131               |
| RAF265       | 1.542       | -0.803               |
| AEW541       | 0.912       | -0.135               |
| L-685458     | 0.967       | -0.644               |
| AZD0530      | 0.955       | -0.182               |
| Topotecan    | 2.043       | -0.800               |
| 17-AAG       | 1.898       | -0.230               |
| Erlotinib    | 0.708       | -0.122               |
| TKI258       | 0.734       | -0.595               |
| PF2341066    | 0.674       | 0.013                |
| Lapatinib    | 1.003       | -1.483               |
| Sorafenib    | 0.468       | -0.376               |
| PLX4720      | 0.619       | -2.403               |

R<sup>2</sup>, R-squared value; RMSE, root mean squared error.

**Supplementary Table S18. Performance of the models for 24 individual drugs in setting 2, using ResNet.**

| <b>Drug</b>  | <b>RMSE</b> | <b>R<sup>2</sup></b> |
|--------------|-------------|----------------------|
| Nilotinib    | 1.005       | -0.035               |
| PHA-665752   | 0.389       | -0.244               |
| AZD6244      | 1.592       | -0.005               |
| PD-0325901   | 2.239       | -0.025               |
| Panobinostat | 1.210       | -1.141               |
| Nutlin-3     | 0.962       | -0.303               |
| PD-0332991   | 0.630       | -0.431               |
| Paclitaxel   | 2.952       | -1.210               |
| LBW242       | 0.847       | -0.041               |
| ZD-6474      | 0.870       | -0.036               |
| Irinotecan   | 1.446       | -0.188               |
| TAE684       | 1.244       | -0.196               |
| RAF265       | 1.185       | -0.066               |
| AEW541       | 0.925       | -0.167               |
| L-685458     | 0.857       | -0.290               |
| AZD0530      | 0.919       | -0.096               |
| Topotecan    | 1.538       | -0.020               |
| 17-AAG       | 1.880       | -0.207               |
| Erlotinib    | 0.703       | -0.106               |
| TKI258       | 0.608       | -0.095               |
| PF2341066    | 0.944       | -0.939               |
| Lapatinib    | 0.669       | -0.104               |
| Sorafenib    | 0.632       | -1.509               |
| PLX4720      | 0.847       | -5.377               |

R<sup>2</sup>, R-squared value; RMSE, root mean squared error.

**Supplementary Table S19. Performance of the models for 24 individual drugs in setting 2, using CNN.**

| <b>Drug</b>  | <b>RMSE</b> | <b>R<sup>2</sup></b> |
|--------------|-------------|----------------------|
| Nilotinib    | 0.994       | -0.014               |
| PHA-665752   | 0.360       | -0.063               |
| AZD6244      | 1.627       | -0.049               |
| PD-0325901   | 2.224       | -0.011               |
| Panobinostat | 0.837       | -0.024               |
| Nutlin-3     | 0.848       | -0.012               |
| PD-0332991   | 0.536       | -0.036               |
| Paclitaxel   | 1.982       | 0.004                |
| LBW242       | 0.837       | -0.018               |
| ZD-6474      | 0.856       | -0.004               |
| Irinotecan   | 1.326       | 0.001                |
| TAE684       | 1.142       | -0.008               |
| RAF265       | 1.188       | -0.072               |
| AEW541       | 0.852       | 0.009                |
| L-685458     | 0.765       | -0.028               |
| AZD0530      | 0.891       | -0.030               |
| Topotecan    | 1.575       | -0.070               |
| 17-AAG       | 1.713       | -0.002               |
| Erlotinib    | 0.661       | 0.023                |
| TKI258       | 1.686       | -7.405               |
| PF2341066    | 0.679       | -0.002               |
| Lapatinib    | 0.634       | 0.008                |
| Sorafenib    | 0.404       | -0.022               |
| PLX4720      | 0.390       | -0.353               |

R<sup>2</sup>, R-squared value; RMSE, root mean squared error.

**Supplementary Table S20. Model architecture and respective parameters in the CNN model (setting 1).**

| Layer (type)                   | Output Shape     | Param # |
|--------------------------------|------------------|---------|
| cell_input (InputLayer)        | (None, 18988, 1) | 0       |
| conv1d_1 (Conv1D)              | (None, 3658, 50) | 35050   |
| max_pooling1d_1 (MaxPooling1D) | (None, 731, 50)  | 0       |
| conv1d_2 (Conv1D)              | (None, 364, 30)  | 7530    |
| max_pooling1d_2 (MaxPooling1D) | (None, 36, 30)   | 0       |
| flatten_1 (Flatten)            | (None, 1080)     | 0       |
| dense_1 (Dense)                | (None, 100)      | 108100  |
| dropout_1 (Dropout)            | (None, 100)      | 0       |
| dense_2 (Dense)                | (None, 300)      | 30300   |
| dropout_2 (Dropout)            | (None, 300)      | 0       |
| reshape_1 (Reshape)            | (None, 300, 1)   | 0       |
| conv1d_3 (Conv1D)              | (None, 151, 30)  | 4530    |
| max_pooling1d_3 (MaxPooling1D) | (None, 75, 30)   | 0       |
| conv1d_4 (Conv1D)              | (None, 71, 10)   | 1510    |
| max_pooling1d_4 (MaxPooling1D) | (None, 23, 10)   | 0       |
| conv1d_5 (Conv1D)              | (None, 19, 5)    | 255     |
| max_pooling1d_5 (MaxPooling1D) | (None, 6, 5)     | 0       |
| dropout_3 (Dropout)            | (None, 6, 5)     | 0       |
| flatten_2 (Flatten)            | (None, 30)       | 0       |
| dropout_4 (Dropout)            | (None, 30)       | 0       |
| pred_inIC50 (Dense)            | (None, 1)        | 31      |

|                                  |  |  |
|----------------------------------|--|--|
| <b>Total params: 187,306</b>     |  |  |
| <b>Trainable params: 187,306</b> |  |  |
| <b>Non-trainable params: 0</b>   |  |  |

**Supplementary Table S21. Model architecture and respective parameters in the CNN model (setting 2).**

| Layer (type)                   | Output Shape     | Param # |
|--------------------------------|------------------|---------|
| cell_input (InputLayer)        | (None, 21213, 1) | 0       |
| conv1d_1 (Conv1D)              | (None, 4103, 50) | 35050   |
| max_pooling1d_1 (MaxPooling1D) | (None, 820, 50)  | 0       |
| conv1d_2 (Conv1D)              | (None, 408, 30)  | 7530    |
| max_pooling1d_2 (MaxPooling1D) | (None, 40, 30)   | 0       |
| flatten_1 (Flatten)            | (None, 1200)     | 0       |
| dense_1 (Dense)                | (None, 100)      | 120100  |
| dropout_1 (Dropout)            | (None, 100)      | 0       |
| dense_2 (Dense)                | (None, 300)      | 30300   |
| dropout_2 (Dropout)            | (None, 300)      | 0       |
| reshape_1 (Reshape)            | (None, 300, 1)   | 0       |
| conv1d_3 (Conv1D)              | (None, 151, 30)  | 4530    |
| max_pooling1d_3 (MaxPooling1D) | (None, 75, 30)   | 0       |
| conv1d_4 (Conv1D)              | (None, 71, 10)   | 1510    |
| max_pooling1d_4 (MaxPooling1D) | (None, 23, 10)   | 0       |
| conv1d_5 (Conv1D)              | (None, 19, 5)    | 255     |
| max_pooling1d_5 (MaxPooling1D) | (None, 6, 5)     | 0       |
| dropout_3 (Dropout)            | (None, 6, 5)     | 0       |



|                                  |            |    |
|----------------------------------|------------|----|
| <b>flatten_2 (Flatten)</b>       | (None, 30) | 0  |
| <b>dropout_4 (Dropout)</b>       | (None, 30) | 0  |
| <b>pred_InIC50 (Dense)</b>       | (None, 1)  | 31 |
| <b>Total params: 199,306</b>     |            |    |
| <b>Trainable params: 199,306</b> |            |    |
| <b>Non-trainable params: 0</b>   |            |    |

**Supplementary Table S22. Model architecture and respective parameters in the ResNet model (setting 1).**

| Layer (type)                               | Output Shape     | Param # | Connected to                                               |
|--------------------------------------------|------------------|---------|------------------------------------------------------------|
| inputs (InputLayer)                        | (None, 18988, 1) | 0       |                                                            |
| conv1d_1 (Conv1D)                          | (None, 9494, 16) | 64      | inputs[0][0]                                               |
| max_pooling1d_1 (MaxPooling1D)             | (None, 1898, 16) | 0       | conv1d_1[0][0]                                             |
| batch_normalization_1 (BatchNormalization) | (None, 1898, 16) | 64      | max_pooling1d_1[0][0]                                      |
| activation_1 (Activation)                  | (None, 1898, 16) | 0       | batch_normalization_1[0][0]                                |
| conv1d_2 (Conv1D)                          | (None, 1898, 16) | 784     | activation_1[0][0]                                         |
| batch_normalization_2 (BatchNormalization) | (None, 1898, 16) | 64      | conv1d_2[0][0]                                             |
| activation_2 (Activation)                  | (None, 1898, 16) | 0       | batch_normalization_2[0][0]                                |
| conv1d_3 (Conv1D)                          | (None, 1898, 16) | 784     | activation_2[0][0]                                         |
| batch_normalization_3 (BatchNormalization) | (None, 1898, 16) | 64      | conv1d_3[0][0]                                             |
| activation_3 (Activation)                  | (None, 1898, 16) | 0       | batch_normalization_3[0][0]                                |
| conv1d_4 (Conv1D)                          | (None, 1898, 16) | 784     | activation_3[0][0]                                         |
| batch_normalization_4 (BatchNormalization) | (None, 1898, 16) | 64      | conv1d_4[0][0]                                             |
| add_1 (Add)                                | (None, 1898, 16) | 0       | batch_normalization_4[0][0]<br>batch_normalization_2[0][0] |
| activation_4 (Activation)                  | (None, 1898, 16) | 0       | add_1[0][0]                                                |
| conv1d_5 (Conv1D)                          | (None, 1898, 16) | 784     | activation_4[0][0]                                         |
| batch_normalization_5 (BatchNormalization) | (None, 1898, 16) | 64      | conv1d_5[0][0]                                             |

|                                                    |                  |      |                                                             |
|----------------------------------------------------|------------------|------|-------------------------------------------------------------|
| <b>activation_5 (Activation)</b>                   | (None, 1898, 16) | 0    | batch_normalization_5[0][0]                                 |
| <b>conv1d_6 (Conv1D)</b>                           | (None, 1898, 16) | 784  | activation_5[0][0]                                          |
| <b>batch_normalization_6 (BatchNormalization)</b>  | (None, 1898, 16) | 64   | conv1d_6[0][0]                                              |
| <b>activation_6 (Activation)</b>                   | (None, 1898, 16) | 0    | batch_normalization_6[0][0]                                 |
| <b>conv1d_7 (Conv1D)</b>                           | (None, 1898, 16) | 784  | activation_6[0][0]                                          |
| <b>batch_normalization_7 (BatchNormalization)</b>  | (None, 1898, 16) | 64   | conv1d_7[0][0]                                              |
| <b>activation_7 (Activation)</b>                   | (None, 1898, 16) | 0    | batch_normalization_7[0][0]                                 |
| <b>conv1d_8 (Conv1D)</b>                           | (None, 1898, 16) | 784  | activation_7[0][0]                                          |
| <b>batch_normalization_8 (BatchNormalization)</b>  | (None, 1898, 16) | 64   | conv1d_8[0][0]                                              |
| <b>add_2 (Add)</b>                                 | (None, 1898, 16) | 0    | batch_normalization_8[0][0]<br>batch_normalization_5[0][0]  |
| <b>activation_8 (Activation)</b>                   | (None, 1898, 16) | 0    | add_2[0][0]                                                 |
| <b>conv1d_9 (Conv1D)</b>                           | (None, 949, 32)  | 1568 | activation_8[0][0]                                          |
| <b>batch_normalization_9 (BatchNormalization)</b>  | (None, 949, 32)  | 128  | conv1d_9[0][0]                                              |
| <b>activation_9 (Activation)</b>                   | (None, 949, 32)  | 0    | batch_normalization_9[0][0]                                 |
| <b>conv1d_10 (Conv1D)</b>                          | (None, 949, 32)  | 3104 | activation_9[0][0]                                          |
| <b>conv1d_11 (Conv1D)</b>                          | (None, 949, 32)  | 3104 | conv1d_10[0][0]                                             |
| <b>batch_normalization_10 (BatchNormalization)</b> | (None, 949, 32)  | 128  | conv1d_11[0][0]                                             |
| <b>add_3 (Add)</b>                                 | (None, 949, 32)  | 0    | batch_normalization_10[0][0]<br>batch_normalization_9[0][0] |
| <b>activation_10 (Activation)</b>                  | (None, 949, 32)  | 0    | add_3[0][0]                                                 |

|                                                    |                 |       |                                                              |
|----------------------------------------------------|-----------------|-------|--------------------------------------------------------------|
| <b>conv1d_12 (Conv1D)</b>                          | (None, 949, 32) | 3104  | activation_10[0][0]                                          |
| <b>batch_normalization_11 (BatchNormalization)</b> | (None, 949, 32) | 128   | conv1d_12[0][0]                                              |
| <b>activation_11 (Activation)</b>                  | (None, 949, 32) | 0     | batch_normalization_11[0][0]                                 |
| <b>conv1d_13 (Conv1D)</b>                          | (None, 949, 32) | 3104  | activation_11[0][0]                                          |
| <b>batch_normalization_12 (BatchNormalization)</b> | (None, 949, 32) | 128   | conv1d_13[0][0]                                              |
| <b>add_4 (Add)</b>                                 | (None, 949, 32) | 0     | batch_normalization_12[0][0]<br>batch_normalization_11[0][0] |
| <b>activation_12 (Activation)</b>                  | (None, 949, 32) | 0     | add_4[0][0]                                                  |
| <b>conv1d_14 (Conv1D)</b>                          | (None, 949, 32) | 3104  | activation_12[0][0]                                          |
| <b>batch_normalization_13 (BatchNormalization)</b> | (None, 949, 32) | 128   | conv1d_14[0][0]                                              |
| <b>activation_13 (Activation)</b>                  | (None, 949, 32) | 0     | batch_normalization_13[0][0]                                 |
| <b>conv1d_15 (Conv1D)</b>                          | (None, 949, 32) | 3104  | activation_13[0][0]                                          |
| <b>batch_normalization_14 (BatchNormalization)</b> | (None, 949, 32) | 128   | conv1d_15[0][0]                                              |
| <b>add_5 (Add)</b>                                 | (None, 949, 32) | 0     | batch_normalization_14[0][0]<br>batch_normalization_13[0][0] |
| <b>activation_14 (Activation)</b>                  | (None, 949, 32) | 0     | add_5[0][0]                                                  |
| <b>conv1d_16 (Conv1D)</b>                          | (None, 475, 64) | 6208  | activation_14[0][0]                                          |
| <b>batch_normalization_15 (BatchNormalization)</b> | (None, 475, 64) | 256   | conv1d_16[0][0]                                              |
| <b>activation_15 (Activation)</b>                  | (None, 475, 64) | 0     | batch_normalization_15[0][0]                                 |
| <b>conv1d_17 (Conv1D)</b>                          | (None, 475, 64) | 12352 | activation_15[0][0]                                          |
| <b>conv1d_18 (Conv1D)</b>                          | (None, 475, 64) | 12352 | conv1d_17[0][0]                                              |

|                                                       |                 |          |                                                              |
|-------------------------------------------------------|-----------------|----------|--------------------------------------------------------------|
| <b>batch_normalization_16</b><br>(BatchNormalization) | (None, 475, 64) | 256      | conv1d_18[0][0]                                              |
| <b>add_6 (Add)</b>                                    | (None, 475, 64) | 0        | batch_normalization_16[0][0]<br>batch_normalization_15[0][0] |
| <b>activation_16 (Activation)</b>                     | (None, 475, 64) | 0        | add_6[0][0]                                                  |
| <b>conv1d_19 (Conv1D)</b>                             | (None, 475, 64) | 12352    | activation_16[0][0]                                          |
| <b>batch_normalization_17</b><br>(BatchNormalization) | (None, 475, 64) | 256      | conv1d_19[0][0]                                              |
| <b>activation_17 (Activation)</b>                     | (None, 475, 64) | 0        | batch_normalization_17[0][0]                                 |
| <b>conv1d_20 (Conv1D)</b>                             | (None, 475, 64) | 12352    | activation_17[0][0]                                          |
| <b>batch_normalization_18</b><br>(BatchNormalization) | (None, 475, 64) | 256      | conv1d_20[0][0]                                              |
| <b>add_7 (Add)</b>                                    | (None, 475, 64) | 0        | batch_normalization_18[0][0]<br>batch_normalization_17[0][0] |
| <b>activation_18 (Activation)</b>                     | (None, 475, 64) | 0        | add_7[0][0]                                                  |
| <b>conv1d_21 (Conv1D)</b>                             | (None, 475, 64) | 12352    | activation_18[0][0]                                          |
| <b>batch_normalization_19</b><br>(BatchNormalization) | (None, 475, 64) | 256      | conv1d_21[0][0]                                              |
| <b>activation_19 (Activation)</b>                     | (None, 475, 64) | 0        | batch_normalization_19[0][0]                                 |
| <b>conv1d_22 (Conv1D)</b>                             | (None, 475, 64) | 12352    | activation_19[0][0]                                          |
| <b>batch_normalization_20</b><br>(BatchNormalization) | (None, 475, 64) | 256      | conv1d_22[0][0]                                              |
| <b>add_8 (Add)</b>                                    | (None, 475, 64) | 0        | batch_normalization_20[0][0]<br>batch_normalization_19[0][0] |
| <b>activation_20 (Activation)</b>                     | (None, 475, 64) | 0        | add_8[0][0]                                                  |
| <b>flatten_1 (Flatten)</b>                            | (None, 30400)   | 0        | activation_20[0][0]                                          |
| <b>dense1 (Dense)</b>                                 | (None, 2048)    | 62261248 | flatten_1[0][0]                                              |

|                                                    |              |         |                                                |
|----------------------------------------------------|--------------|---------|------------------------------------------------|
| <b>batch_normalization_21 (BatchNormalization)</b> | (None, 2048) | 8192    | dense1[0][0]                                   |
| <b>dropout1 (Dropout)</b>                          | (None, 2048) | 0       | batch_normalization_21[0][0]                   |
| <b>activation_21 (Activation)</b>                  | (None, 2048) | 0       | dropout1[0][0]                                 |
| <b>dense5 (Dense)</b>                              | (None, 1024) | 2098176 | activation_21[0][0]                            |
| <b>batch_normalization_22 (BatchNormalization)</b> | (None, 1024) | 4096    | dense5[0][0]                                   |
| <b>dropout5 (Dropout)</b>                          | (None, 1024) | 0       | batch_normalization_22[0][0]                   |
| <b>activation_22 (Activation)</b>                  | (None, 1024) | 0       | dropout5[0][0]                                 |
| <b>dense6 (Dense)</b>                              | (None, 512)  | 524800  | activation_22[0][0]                            |
| <b>batch_normalization_23 (BatchNormalization)</b> | (None, 512)  | 2048    | dense6[0][0]                                   |
| <b>dropout6 (Dropout)</b>                          | (None, 512)  | 0       | batch_normalization_23[0][0]                   |
| <b>activation_23 (Activation)</b>                  | (None, 512)  | 0       | dropout6[0][0]                                 |
| <b>dense7 (Dense)</b>                              | (None, 1024) | 525312  | activation_23[0][0]                            |
| <b>batch_normalization_24 (BatchNormalization)</b> | (None, 1024) | 4096    | dense7[0][0]                                   |
| <b>dropout7 (Dropout)</b>                          | (None, 1024) | 0       | batch_normalization_24[0][0]                   |
| <b>add_9 (Add)</b>                                 | (None, 1024) | 0       | dropout7[0][0]<br>batch_normalization_22[0][0] |
| <b>activation_24 (Activation)</b>                  | (None, 1024) | 0       | add_9[0][0]                                    |
| <b>dense8 (Dense)</b>                              | (None, 512)  | 524800  | activation_24[0][0]                            |
| <b>batch_normalization_25 (BatchNormalization)</b> | (None, 512)  | 2048    | dense8[0][0]                                   |
| <b>dropout8 (Dropout)</b>                          | (None, 512)  | 0       | batch_normalization_25[0][0]                   |
| <b>activation_25 (Activation)</b>                  | (None, 512)  | 0       | dropout8[0][0]                                 |
| <b>dense9 (Dense)</b>                              | (None, 256)  | 131328  | activation_25[0][0]                            |
| <b>batch_normalization_26 (BatchNormalization)</b> | (None, 256)  | 1024    | dense9[0][0]                                   |

|                                                    |             |       |                              |
|----------------------------------------------------|-------------|-------|------------------------------|
| <b>dropout9 (Dropout)</b>                          | (None, 256) | 0     | batch_normalization_26[0][0] |
| <b>activation_26 (Activation)</b>                  | (None, 256) | 0     | dropout9[0][0]               |
| <b>dense10 (Dense)</b>                             | (None, 128) | 32896 | activation_26[0][0]          |
| <b>batch_normalization_27 (BatchNormalization)</b> | (None, 128) | 512   | dense10[0][0]                |
| <b>dropout10 (Dropout)</b>                         | (None, 128) | 0     | batch_normalization_27[0][0] |
| <b>activation_27 (Activation)</b>                  | (None, 128) | 0     | dropout10[0][0]              |
| <b>predictions (Dense)</b>                         | (None, 1)   | 129   | activation_27[0][0]          |
| <b>Total params: 66,229,585</b>                    |             |       |                              |
| <b>Trainable params:</b>                           |             |       |                              |
| <b>66,217,169</b>                                  |             |       |                              |
| <b>Non-trainable params:</b>                       |             |       |                              |
| <b>12,416</b>                                      |             |       |                              |

**Supplementary Table S23. Model architecture and respective parameter in the ResNet model (setting 2).**

| Layer (type)                                       | Output Shape      | Param # | Connected to                                               |
|----------------------------------------------------|-------------------|---------|------------------------------------------------------------|
| <b>inputs (InputLayer)</b>                         | (None, 21213, 1)  | 0       |                                                            |
| <b>conv1d_1 (Conv1D)</b>                           | (None, 10607, 16) | 64      | inputs[0][0]                                               |
| <b>max_pooling1d_1 (MaxPooling1D)</b>              | (None, 2121, 16)  | 0       | conv1d_1[0][0]                                             |
| <b>batch_normalization_1 (Batch_normalization)</b> | (None, 2121, 16)  | 64      | max_pooling1d_1[0][0]                                      |
| <b>activation_1 (Activation)</b>                   | (None, 2121, 16)  | 0       | batch_normalization_1[0][0]                                |
| <b>conv1d_2 (Conv1D)</b>                           | (None, 2121, 16)  | 784     | activation_1[0][0]                                         |
| <b>batch_normalization_2 (Batch_normalization)</b> | (None, 2121, 16)  | 64      | conv1d_2[0][0]                                             |
| <b>activation_2 (Activation)</b>                   | (None, 2121, 16)  | 0       | batch_normalization_2[0][0]                                |
| <b>conv1d_3 (Conv1D)</b>                           | (None, 2121, 16)  | 784     | activation_2[0][0]                                         |
| <b>batch_normalization_3 (Batch_normalization)</b> | (None, 2121, 16)  | 64      | conv1d_3[0][0]                                             |
| <b>activation_3 (Activation)</b>                   | (None, 2121, 16)  | 0       | batch_normalization_3[0][0]                                |
| <b>conv1d_4 (Conv1D)</b>                           | (None, 2121, 16)  | 784     | activation_3[0][0]                                         |
| <b>batch_normalization_4 (Batch_normalization)</b> | (None, 2121, 16)  | 64      | conv1d_4[0][0]                                             |
| <b>add_1 (Add)</b>                                 | (None, 2121, 16)  | 0       | batch_normalization_4[0][0]<br>batch_normalization_2[0][0] |
| <b>activation_4 (Activation)</b>                   | (None, 2121, 16)  | 0       | add_1[0][0]                                                |
| <b>conv1d_5 (Conv1D)</b>                           | (None, 2121, 16)  | 784     | activation_4[0][0]                                         |



|                                                        |                     |      |                                                            |
|--------------------------------------------------------|---------------------|------|------------------------------------------------------------|
| <b>batch_normalization_5</b><br>(Batch_normalization)  | (None,<br>2121, 16) | 64   | conv1d_5[0][0]                                             |
| <b>activation_5</b> (Activation)                       | (None,<br>2121, 16) | 0    | batch_normalization_5[0][0]                                |
| <b>conv1d_6</b> (Conv1D)                               | (None,<br>2121, 16) | 784  | activation_5[0][0]                                         |
| <b>batch_normalization_6</b><br>(Batch_normalization)  | (None,<br>2121, 16) | 64   | conv1d_6[0][0]                                             |
| <b>activation_6</b> (Activation)                       | (None,<br>2121, 16) | 0    | batch_normalization_6[0][0]                                |
| <b>conv1d_7</b> (Conv1D)                               | (None,<br>2121, 16) | 784  | activation_6[0][0]                                         |
| <b>batch_normalization_7</b><br>(Batch_normalization)  | (None,<br>2121, 16) | 64   | conv1d_7[0][0]                                             |
| <b>activation_7</b> (Activation)                       | (None,<br>2121, 16) | 0    | batch_normalization_7[0][0]                                |
| <b>conv1d_8</b> (Conv1D)                               | (None,<br>2121, 16) | 784  | activation_7[0][0]                                         |
| <b>batch_normalization_8</b><br>(Batch_normalization)  | (None,<br>2121, 16) | 64   | conv1d_8[0][0]                                             |
| <b>add_2</b> (Add)                                     | (None,<br>2121, 16) | 0    | batch_normalization_8[0][0]<br>batch_normalization_5[0][0] |
| <b>activation_8</b> (Activation)                       | (None,<br>2121, 16) | 0    | add_2[0][0]                                                |
| <b>conv1d_9</b> (Conv1D)                               | (None,<br>1061, 32) | 1568 | activation_8[0][0]                                         |
| <b>batch_normalization_9</b><br>(Batch_normalization)  | (None,<br>1061, 32) | 128  | conv1d_9[0][0]                                             |
| <b>activation_9</b> (Activation)                       | (None,<br>1061, 32) | 0    | batch_normalization_9[0][0]                                |
| <b>conv1d_10</b> (Conv1D)                              | (None,<br>1061, 32) | 3104 | activation_9[0][0]                                         |
| <b>conv1d_11</b> (Conv1D)                              | (None,<br>1061, 32) | 3104 | conv1d_10[0][0]                                            |
| <b>batch_normalization_10</b><br>(Batch_normalization) | (None,<br>1061, 32) | 128  | conv1d_11[0][0]                                            |

|                                                     |                  |      |                                                              |
|-----------------------------------------------------|------------------|------|--------------------------------------------------------------|
| <b>add_3 (Add)</b>                                  | (None, 1061, 32) | 0    | batch_normalization_10[0][0]<br>batch_normalization_9[0][0]  |
| <b>activation_10 (Activation)</b>                   | (None, 1061, 32) | 0    | add_3[0][0]                                                  |
| <b>conv1d_12 (Conv1D)</b>                           | (None, 1061, 32) | 3104 | activation_10[0][0]                                          |
| <b>batch_normalization_11 (Batch_normalization)</b> | (None, 1061, 32) | 128  | conv1d_12[0][0]                                              |
| <b>activation_11 (Activation)</b>                   | (None, 1061, 32) | 0    | batch_normalization_11[0][0]                                 |
| <b>conv1d_13 (Conv1D)</b>                           | (None, 1061, 32) | 3104 | activation_11[0][0]                                          |
| <b>batch_normalization_12 (Batch_normalization)</b> | (None, 1061, 32) | 128  | conv1d_13[0][0]                                              |
| <b>add_4 (Add)</b>                                  | (None, 1061, 32) | 0    | batch_normalization_12[0][0]<br>batch_normalization_11[0][0] |
| <b>activation_12 (Activation)</b>                   | (None, 1061, 32) | 0    | add_4[0][0]                                                  |
| <b>conv1d_14 (Conv1D)</b>                           | (None, 1061, 32) | 3104 | activation_12[0][0]                                          |
| <b>batch_normalization_13 (Batch_normalization)</b> | (None, 1061, 32) | 128  | conv1d_14[0][0]                                              |
| <b>activation_13 (Activation)</b>                   | (None, 1061, 32) | 0    | batch_normalization_13[0][0]                                 |
| <b>conv1d_15 (Conv1D)</b>                           | (None, 1061, 32) | 3104 | activation_13[0][0]                                          |
| <b>batch_normalization_14 (Batch_normalization)</b> | (None, 1061, 32) | 128  | conv1d_15[0][0]                                              |
| <b>add_5 (Add)</b>                                  | (None, 1061, 32) | 0    | batch_normalization_14[0][0]<br>batch_normalization_13[0][0] |
| <b>activation_14 (Activation)</b>                   | (None, 1061, 32) | 0    | add_5[0][0]                                                  |
| <b>conv1d_16 (Conv1D)</b>                           | (None, 531, 64)  | 6208 | activation_14[0][0]                                          |
| <b>batch_normalization_15 (Batch_normalization)</b> | (None, 531, 64)  | 256  | conv1d_16[0][0]                                              |

|                                                     |                 |       |                                                              |
|-----------------------------------------------------|-----------------|-------|--------------------------------------------------------------|
| <b>activation_15 (Activation)</b>                   | (None, 531, 64) | 0     | batch_normalization_15[0][0]                                 |
| <b>conv1d_17 (Conv1D)</b>                           | (None, 531, 64) | 12352 | activation_15[0][0]                                          |
| <b>conv1d_18 (Conv1D)</b>                           | (None, 531, 64) | 12352 | conv1d_17[0][0]                                              |
| <b>batch_normalization_16 (Batch_normalization)</b> | (None, 531, 64) | 256   | conv1d_18[0][0]                                              |
| <b>add_6 (Add)</b>                                  | (None, 531, 64) | 0     | batch_normalization_16[0][0]<br>batch_normalization_15[0][0] |
| <b>activation_16 (Activation)</b>                   | (None, 531, 64) | 0     | add_6[0][0]                                                  |
| <b>conv1d_19 (Conv1D)</b>                           | (None, 531, 64) | 12352 | activation_16[0][0]                                          |
| <b>batch_normalization_17 (Batch_normalization)</b> | (None, 531, 64) | 256   | conv1d_19[0][0]                                              |
| <b>activation_17 (Activation)</b>                   | (None, 531, 64) | 0     | batch_normalization_17[0][0]                                 |
| <b>conv1d_20 (Conv1D)</b>                           | (None, 531, 64) | 12352 | activation_17[0][0]                                          |
| <b>batch_normalization_18 (Batch_normalization)</b> | (None, 531, 64) | 256   | conv1d_20[0][0]                                              |
| <b>add_7 (Add)</b>                                  | (None, 531, 64) | 0     | batch_normalization_18[0][0]<br>batch_normalization_17[0][0] |
| <b>activation_18 (Activation)</b>                   | (None, 531, 64) | 0     | add_7[0][0]                                                  |
| <b>conv1d_21 (Conv1D)</b>                           | (None, 531, 64) | 12352 | activation_18[0][0]                                          |
| <b>batch_normalization_19 (Batch_normalization)</b> | (None, 531, 64) | 256   | conv1d_21[0][0]                                              |
| <b>activation_19 (Activation)</b>                   | (None, 531, 64) | 0     | batch_normalization_19[0][0]                                 |
| <b>conv1d_22 (Conv1D)</b>                           | (None, 531, 64) | 12352 | activation_19[0][0]                                          |
| <b>batch_normalization_20 (Batch_normalization)</b> | (None, 531, 64) | 256   | conv1d_22[0][0]                                              |

|                                                     |                 |          |                                                              |
|-----------------------------------------------------|-----------------|----------|--------------------------------------------------------------|
| <b>add_8 (Add)</b>                                  | (None, 531, 64) | 0        | batch_normalization_20[0][0]<br>batch_normalization_19[0][0] |
| <b>activation_20 (Activation)</b>                   | (None, 531, 64) | 0        | add_8[0][0]                                                  |
| <b>flatten_1 (Flatten)</b>                          | (None, 33984)   | 0        | activation_20[0][0]                                          |
| <b>dense1 (Dense)</b>                               | (None, 2048)    | 69601280 | flatten_1[0][0]                                              |
| <b>batch_normalization_21 (Batch_normalization)</b> | (None, 2048)    | 8192     | dense1[0][0]                                                 |
| <b>dropout1 (Dropout)</b>                           | (None, 2048)    | 0        | batch_normalization_21[0][0]                                 |
| <b>activation_21 (Activation)</b>                   | (None, 2048)    | 0        | dropout1[0][0]                                               |
| <b>dense5 (Dense)</b>                               | (None, 1024)    | 2098176  | activation_21[0][0]                                          |
| <b>batch_normalization_22 (Batch_normalization)</b> | (None, 1024)    | 4096     | dense5[0][0]                                                 |
| <b>dropout5 (Dropout)</b>                           | (None, 1024)    | 0        | batch_normalization_22[0][0]                                 |
| <b>activation_22 (Activation)</b>                   | (None, 1024)    | 0        | dropout5[0][0]                                               |
| <b>dense6 (Dense)</b>                               | (None, 512)     | 524800   | activation_22[0][0]                                          |
| <b>batch_normalization_23 (Batch_normalization)</b> | (None, 512)     | 2048     | dense6[0][0]                                                 |
| <b>dropout6 (Dropout)</b>                           | (None, 512)     | 0        | batch_normalization_23[0][0]                                 |
| <b>activation_23 (Activation)</b>                   | (None, 512)     | 0        | dropout6[0][0]                                               |
| <b>dense7 (Dense)</b>                               | (None, 1024)    | 525312   | activation_23[0][0]                                          |
| <b>batch_normalization_24 (Batch_normalization)</b> | (None, 1024)    | 4096     | dense7[0][0]                                                 |
| <b>dropout7 (Dropout)</b>                           | (None, 1024)    | 0        | batch_normalization_24[0][0]                                 |

|                                                                                                                                   |              |        |                                                |
|-----------------------------------------------------------------------------------------------------------------------------------|--------------|--------|------------------------------------------------|
| <b>add_9 (Add)</b>                                                                                                                | (None, 1024) | 0      | dropout7[0][0]<br>batch_normalization_22[0][0] |
| <b>activation_24 (Activation)</b>                                                                                                 | (None, 1024) | 0      | add_9[0][0]                                    |
| <b>dense8 (Dense)</b>                                                                                                             | (None, 512)  | 524800 | activation_24[0][0]                            |
| <b>batch_normalization_25 (Batch_normalization)</b>                                                                               | (None, 512)  | 2048   | dense8[0][0]                                   |
| <b>dropout8 (Dropout)</b>                                                                                                         | (None, 512)  | 0      | batch_normalization_25[0][0]                   |
| <b>activation_25 (Activation)</b>                                                                                                 | (None, 512)  | 0      | dropout8[0][0]                                 |
| <b>dense9 (Dense)</b>                                                                                                             | (None, 256)  | 131328 | activation_25[0][0]                            |
| <b>batch_normalization_26 (Batch_normalization)</b>                                                                               | (None, 256)  | 1024   | dense9[0][0]                                   |
| <b>dropout9 (Dropout)</b>                                                                                                         | (None, 256)  | 0      | batch_normalization_26[0][0]                   |
| <b>activation_26 (Activation)</b>                                                                                                 | (None, 256)  | 0      | dropout9[0][0]                                 |
| <b>dense10 (Dense)</b>                                                                                                            | (None, 128)  | 32896  | activation_26[0][0]                            |
| <b>batch_normalization_27 (Batch_normalization)</b>                                                                               | (None, 128)  | 512    | dense10[0][0]                                  |
| <b>dropout10 (Dropout)</b>                                                                                                        | (None, 128)  | 0      | batch_normalization_27[0][0]                   |
| <b>activation_27 (Activation)</b>                                                                                                 | (None, 128)  | 0      | dropout10[0][0]                                |
| <b>predictions (Dense)</b>                                                                                                        | (None, 1)    | 129    | activation_27[0][0]                            |
| <b>Total params: 73,569,617</b><br><b>Trainable params:</b><br><b>73,557,201</b><br><b>Non-trainable params:</b><br><b>12,416</b> |              |        |                                                |

**Supplementary Table S24. Methods and respective parameters for the models for 24 individual drugs in setting 1.**

| <b>Methods</b> | <b>Parameter options in Keras and scikit-learn</b>                                                                                                                                                                                                                                    |
|----------------|---------------------------------------------------------------------------------------------------------------------------------------------------------------------------------------------------------------------------------------------------------------------------------------|
| CNN            | Total params: 187,306<br>Total number of layers: 13 layers<br>Architecture: Supplementary Table S20, Figure S21<br>Loss function: mean square error (MSE)<br>Optimizer: Adam<br>Learning rate: 0.0002<br>Training epoch: 40<br>Batch size: 20                                         |
| ResNet         | Total params: 66,229,585<br>Total number of layers: 30 layers (including 9-times skip connections)<br>Architecture: Supplementary Table S22, Figure S22<br>Loss function: mean square error (MSE)<br>Optimizer: Adam<br>Learning rate: 0.0002<br>Training epoch: 40<br>Batch size: 20 |
| Lasso          | Alpha = 0.001                                                                                                                                                                                                                                                                         |
| Ridge          | Alpha = 0.001                                                                                                                                                                                                                                                                         |
| ElasticNet     | Alpha = 0.001                                                                                                                                                                                                                                                                         |
| SVR            | C = 0.01                                                                                                                                                                                                                                                                              |
| XGBoost        | Default                                                                                                                                                                                                                                                                               |
| Random forest  | Default                                                                                                                                                                                                                                                                               |

**Supplementary Table S25. Methods and their parameters of models for 24 individual drugs in setting 2.**

| Methods       | Parameter options in Keras and scikit-learn packages                                                                                                                                                                                                                                  |
|---------------|---------------------------------------------------------------------------------------------------------------------------------------------------------------------------------------------------------------------------------------------------------------------------------------|
| CNN           | Total params: 199,306<br>Total number of layers: 13 layers<br>Architecture: Supplementary Table S21, Figure S21<br>Loss function: mean square error (MSE)<br>Optimizer: Adam<br>Learning rate: 0.0002<br>Training epoch: 40<br>Batch size: 20                                         |
| ResNet        | Total params: 73,569,617<br>Total number of layers: 30 layers (including 9-times skip connections)<br>Architecture: Supplementary Table S23, Figure S22<br>Loss function: mean square error (MSE)<br>Optimizer: Adam<br>Learning rate: 0.0002<br>Training epoch: 40<br>Batch size: 20 |
| Lasso         | Alpha = 0.001                                                                                                                                                                                                                                                                         |
| Ridge         | Alpha = 0.001                                                                                                                                                                                                                                                                         |
| ElasticNet    | Alpha = 0.001                                                                                                                                                                                                                                                                         |
| SVR           | C = 0.01                                                                                                                                                                                                                                                                              |
| XGBoost       | Default                                                                                                                                                                                                                                                                               |
| Random forest | Default                                                                                                                                                                                                                                                                               |

**Supplementary Figure S1. Data structures for setting 1 (24 individual drugs from EC-11K) and setting 2 (24 individual drugs from MC-9K). (a) Settings 1 and (b) 2 were used for the one-drug one-model approach of each 24 drugs. Column  $\ln(\text{IC}_{50})$ s represents the output variable for each drug treatment in each cell line.**

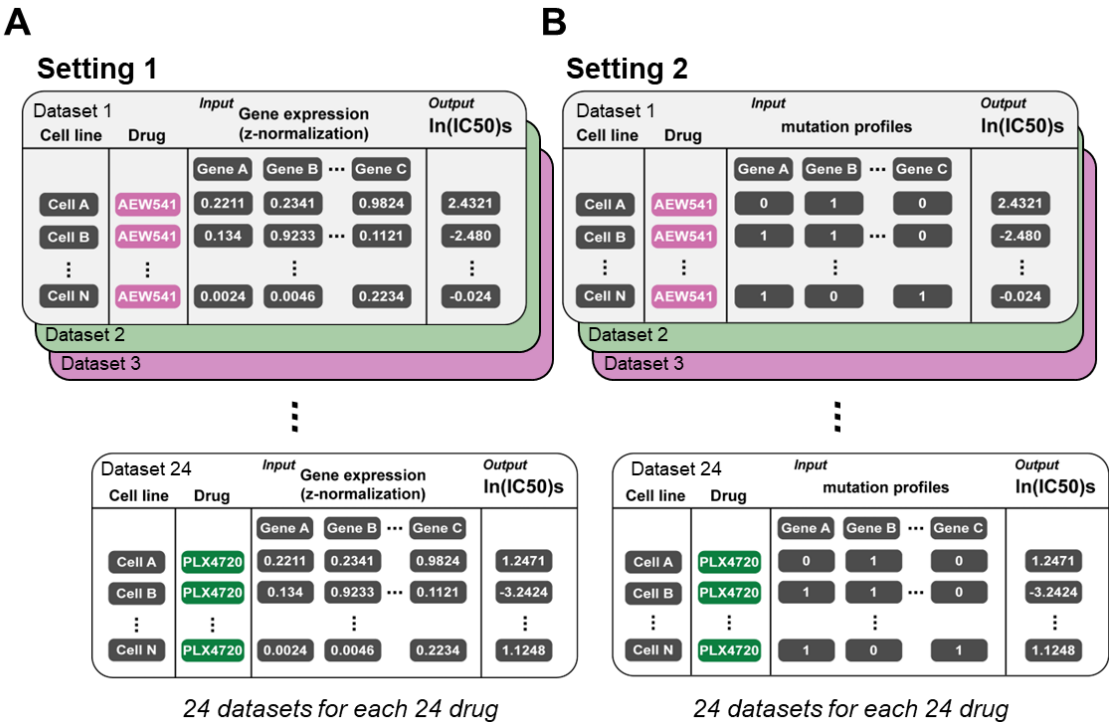



**Supplementary Figure S2. The 24 lasso models for 24 individual drugs in setting 1.** Considering a drug, the subset from the EC-11K training set was obtained to train the drug's  $IC_{50}$  prediction lasso model, which was validated in the subset corresponding to the drug from the EC-11K test set.

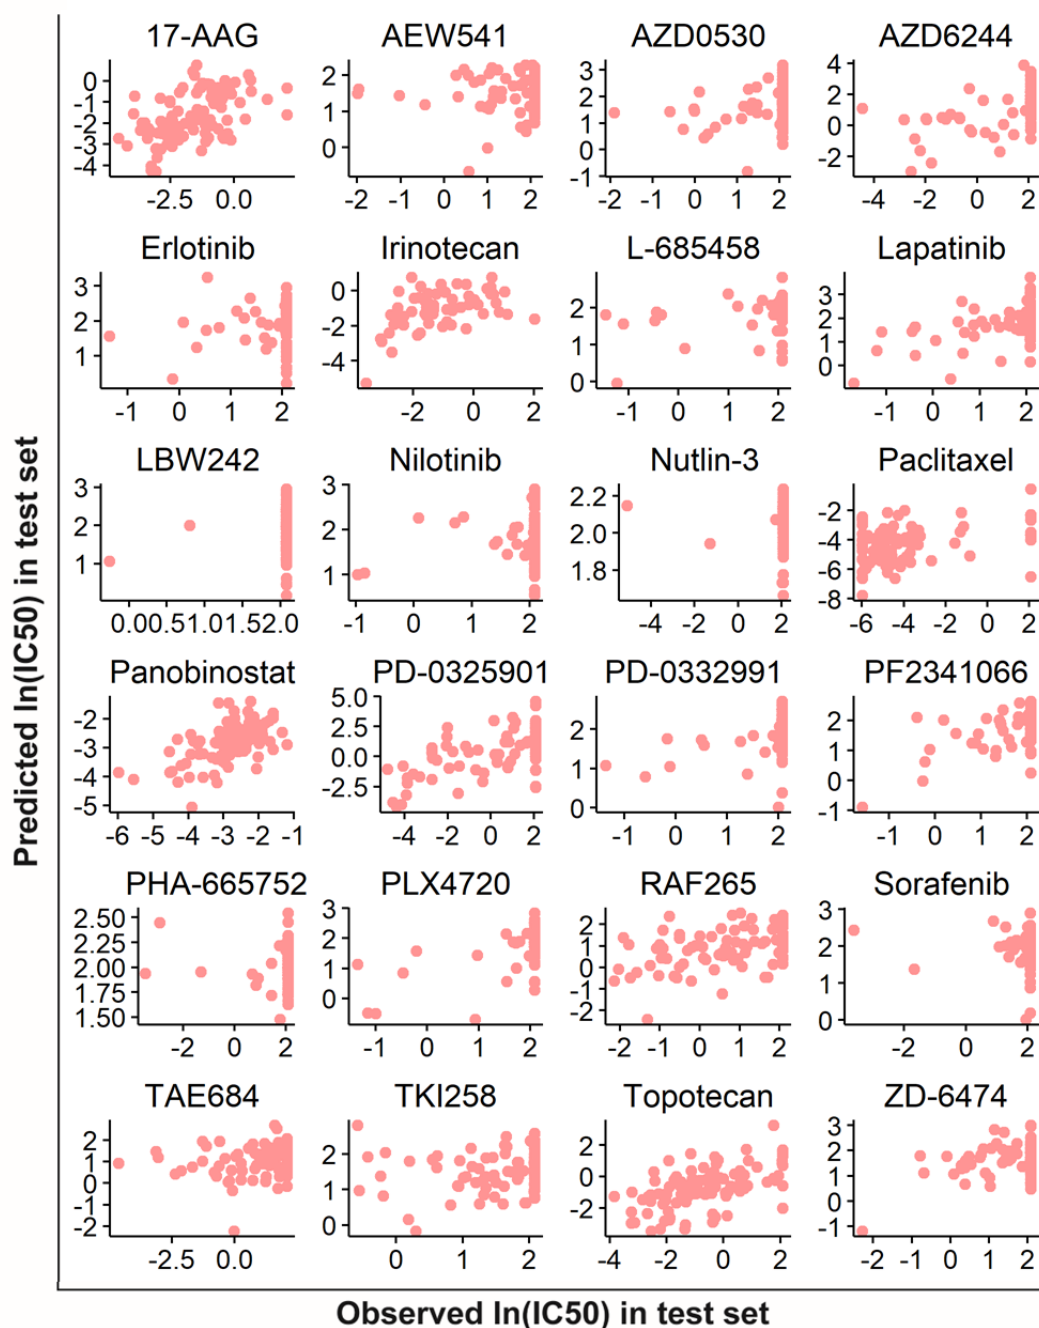

**Supplementary Figure S3. The 24 ridge models for 24 individual drugs in setting 1.** For each drug, the  $IC_{50}$  prediction ridge model was constructed from the EC-11K training set and was validated using the EC-11K test set.

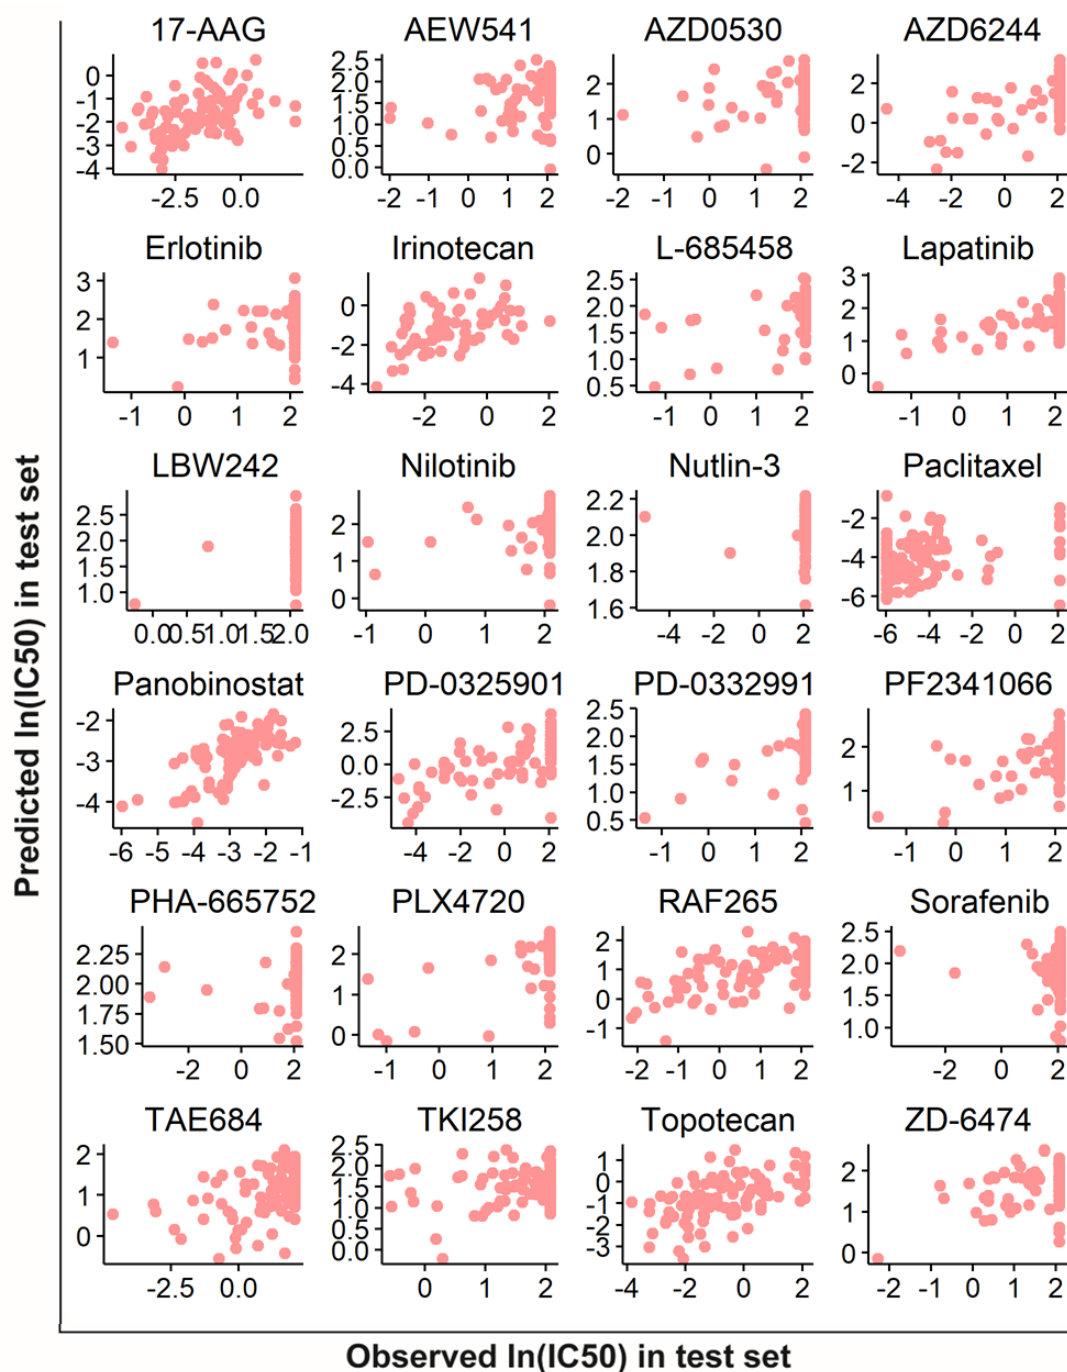

**Supplementary Figure S4. The 24 SVR models for 24 individual drugs in setting 1.** For each drug, the IC<sub>50</sub> prediction SVR model was constructed from the EC-11K training set and was validated using the EC-11K test set.

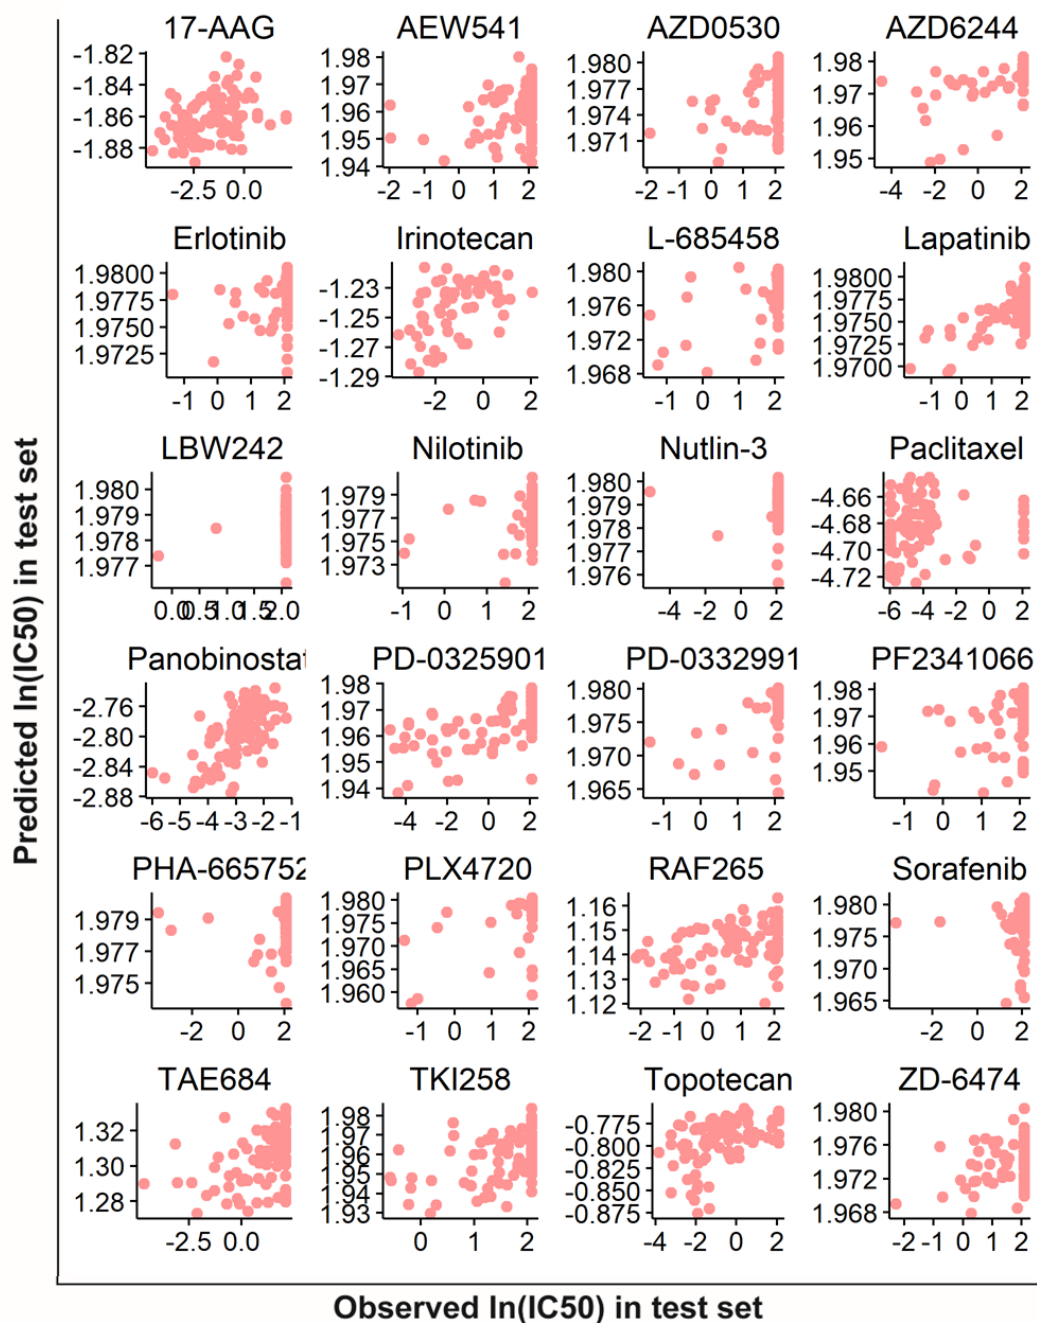

**Supplementary Figure S5. The 24 random forest models for 24 individual drugs in setting 1.** For each drug, the IC<sub>50</sub> prediction random forest model was constructed from the EC-11K training set and was validated using the EC-11K test set.

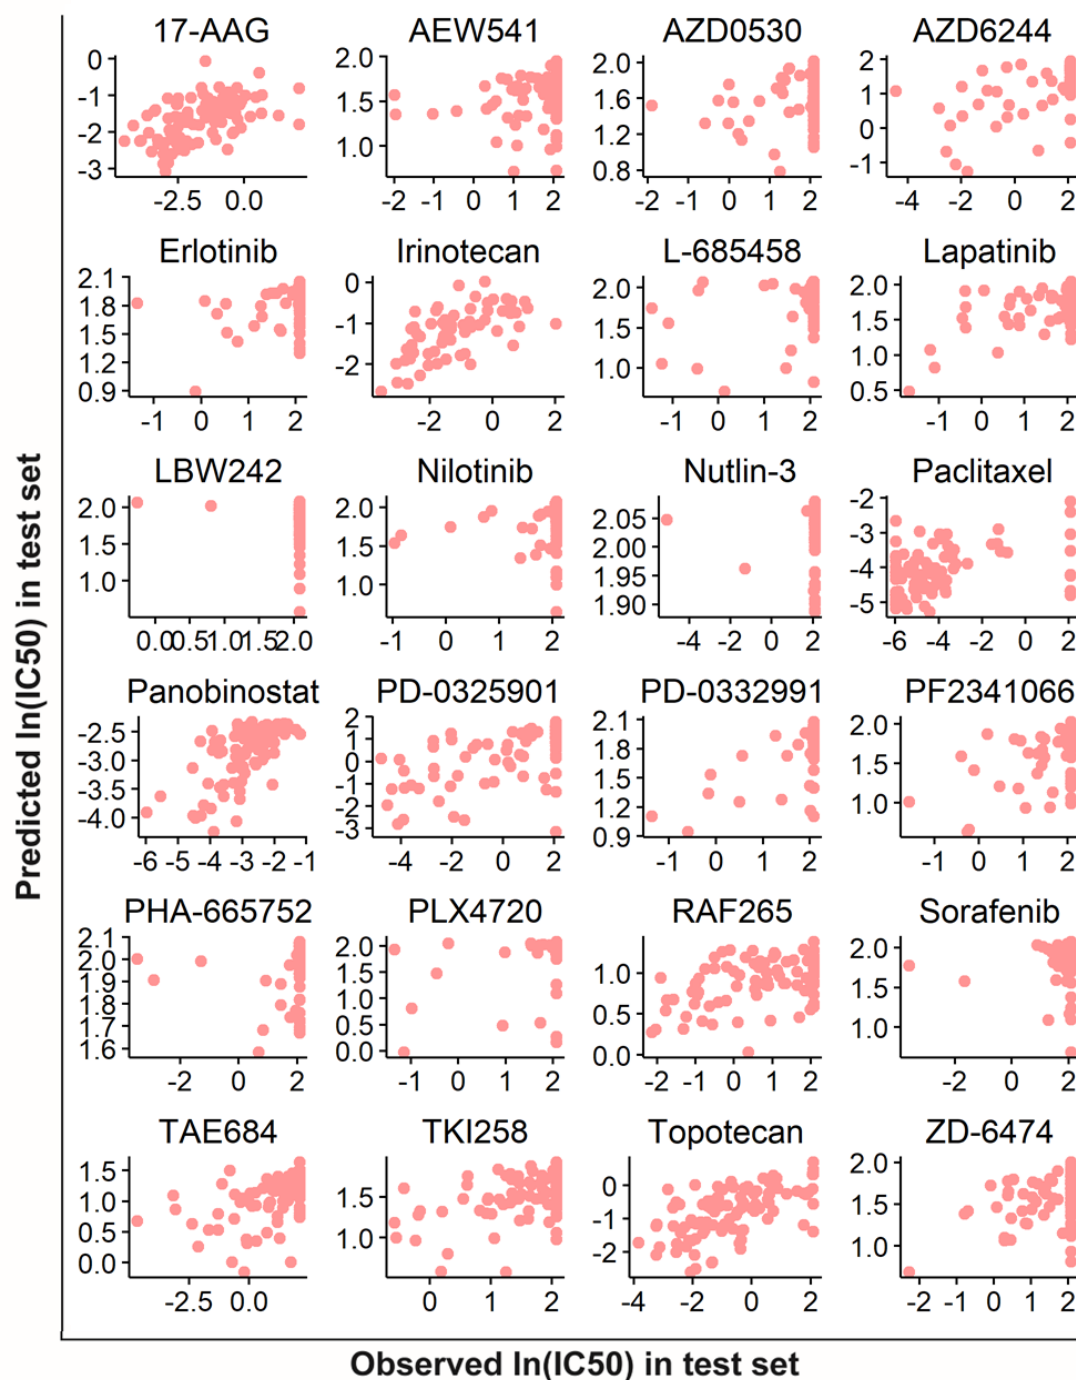

**Supplementary Figure S6. The 24 XGBoost models for 24 individual drugs in setting 1.** For each drug, the IC<sub>50</sub> prediction XGBoost model was constructed from the EC-11K training set and was validated using the EC-11K test set.

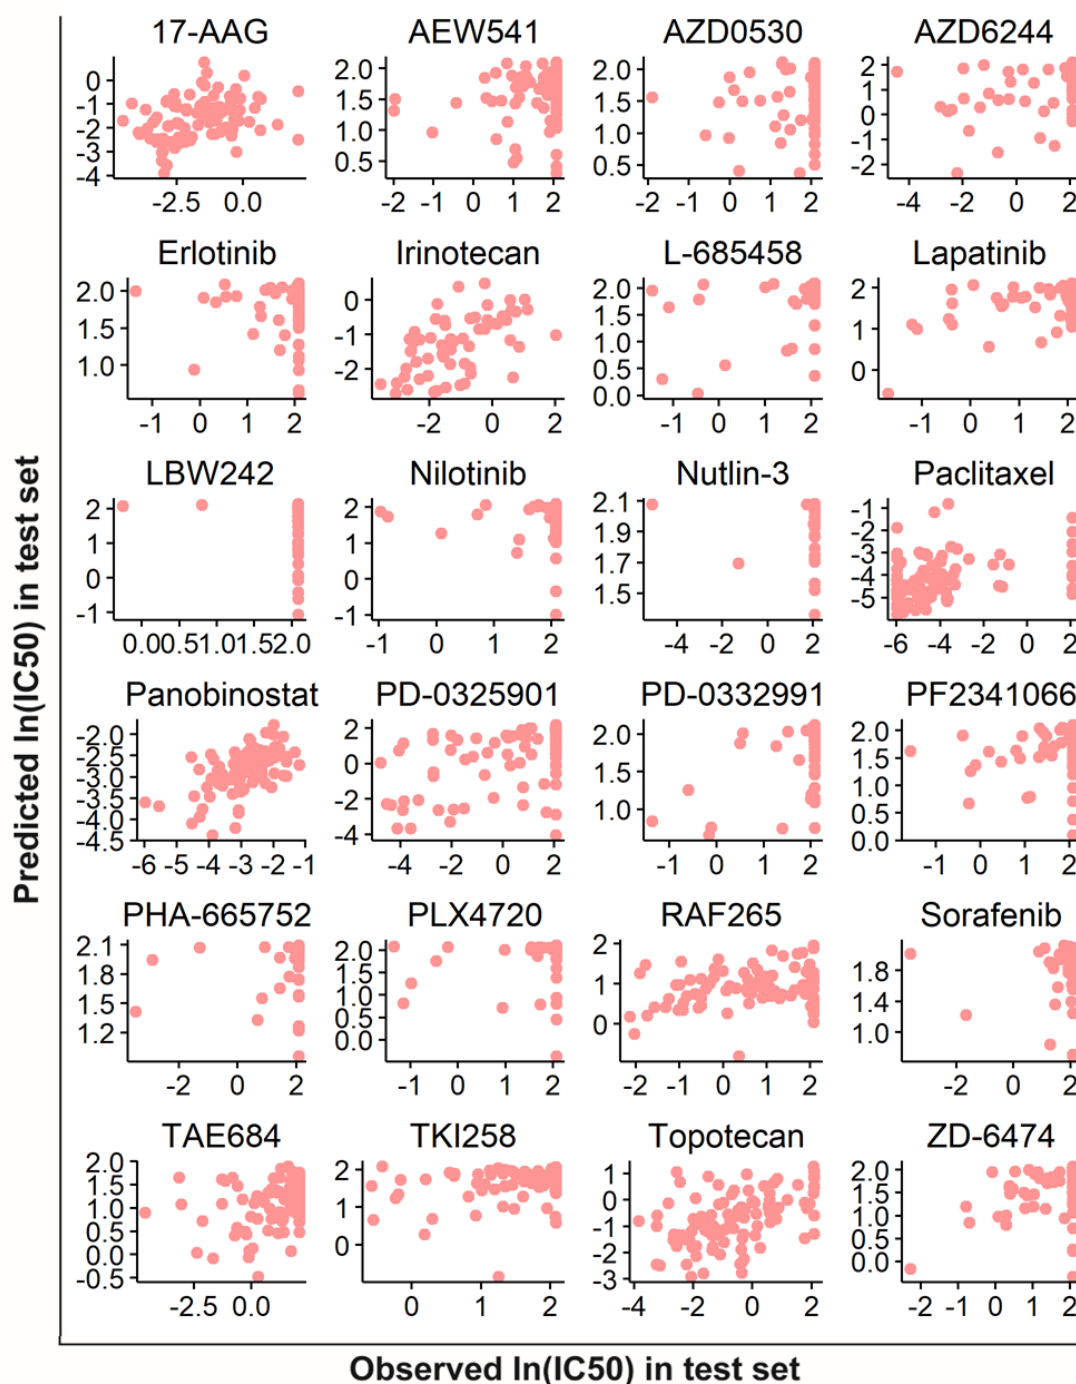

**Supplementary Figure S7. The 24 ElasticNet models for 24 individual drugs in setting 1.** For each drug, the IC<sub>50</sub> prediction ridge model was constructed from the EC-11K training set and was validated using the EC-11K test set.

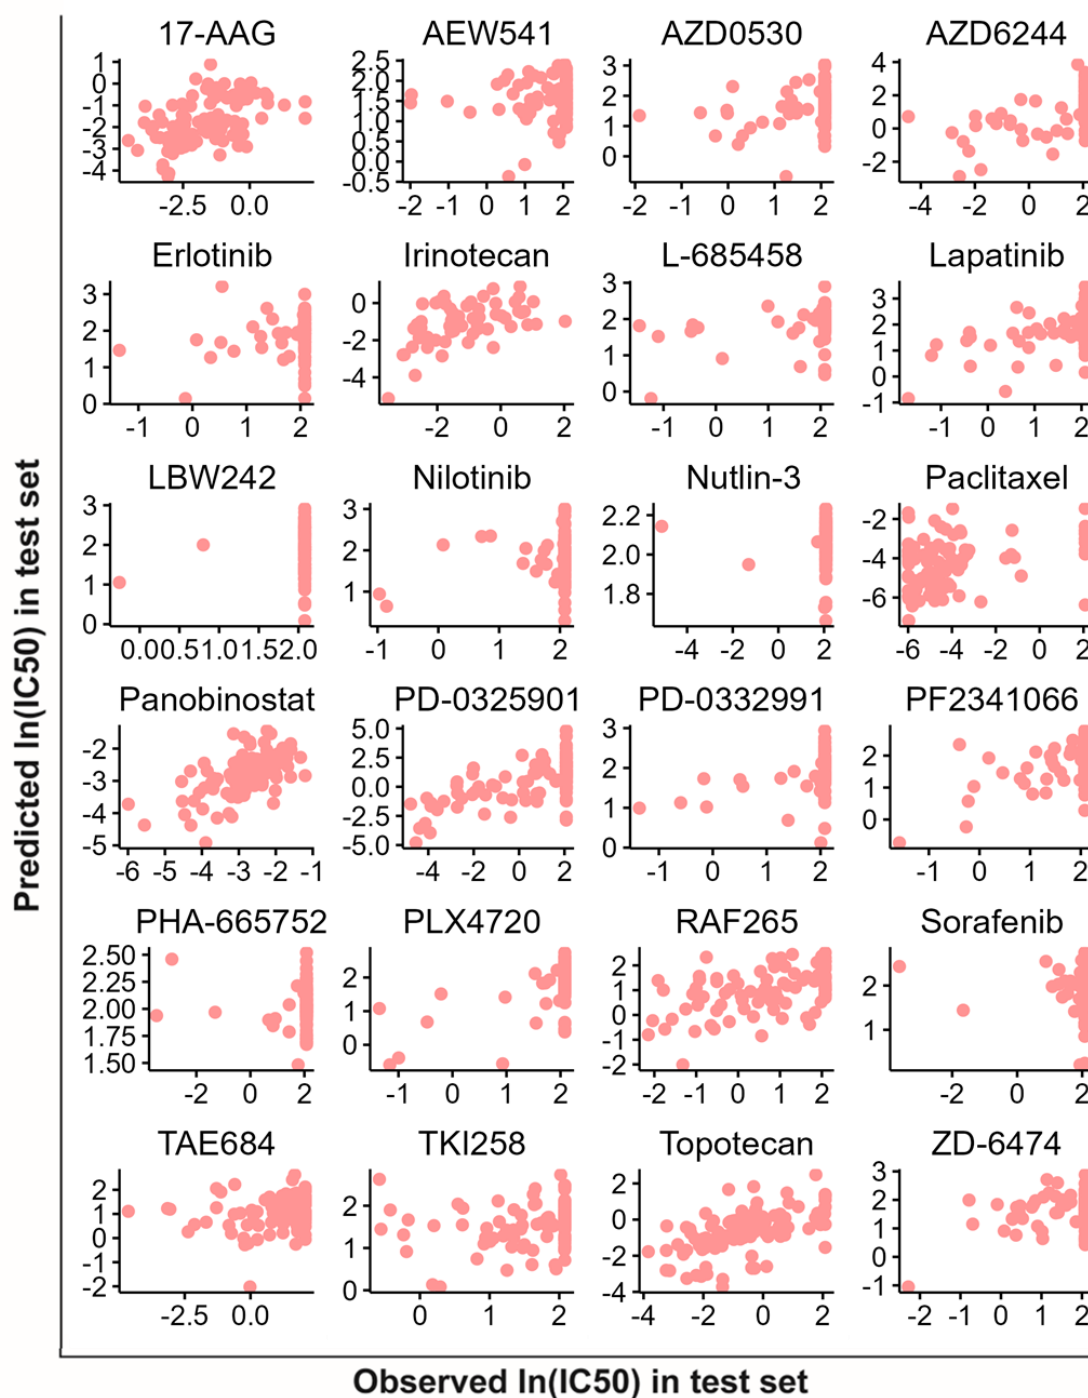



**Supplementary Figure S8. The 24 ResNet models for 24 individual drugs in setting 1.** For each drug, the IC<sub>50</sub> prediction ResNet model was constructed from the EC-11K training set and was validated using the EC-11K test set.

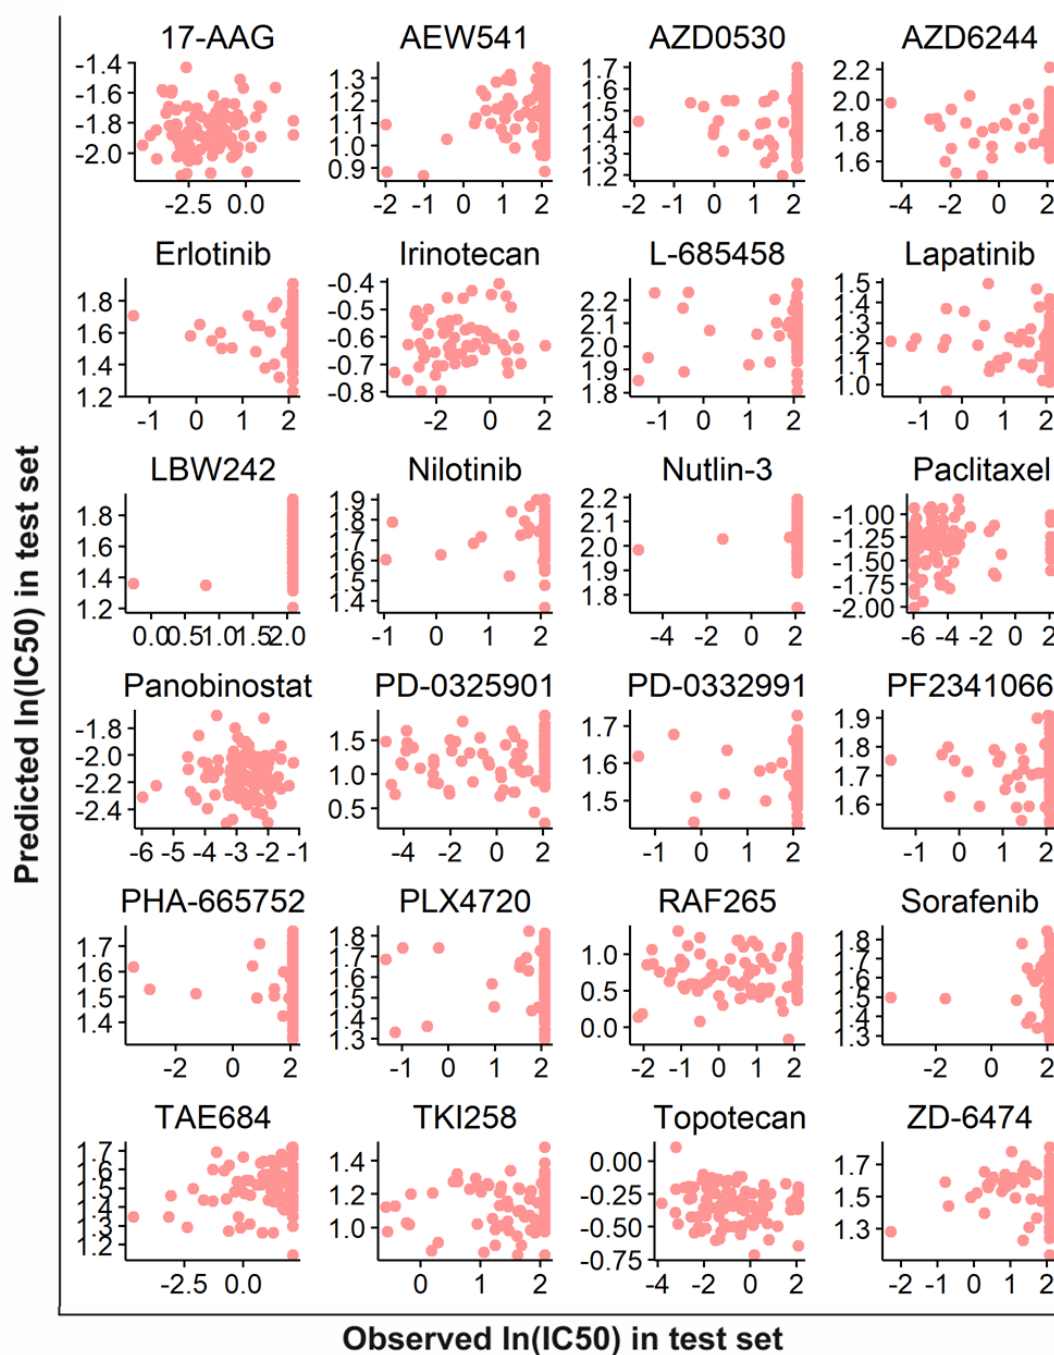

**Supplementary Figure S9. The 24 CNN models for 24 individual drugs in setting 1.** For each drug, the IC<sub>50</sub> prediction CNN model was constructed from the EC-11K training set and was validated using the EC-11K test set.

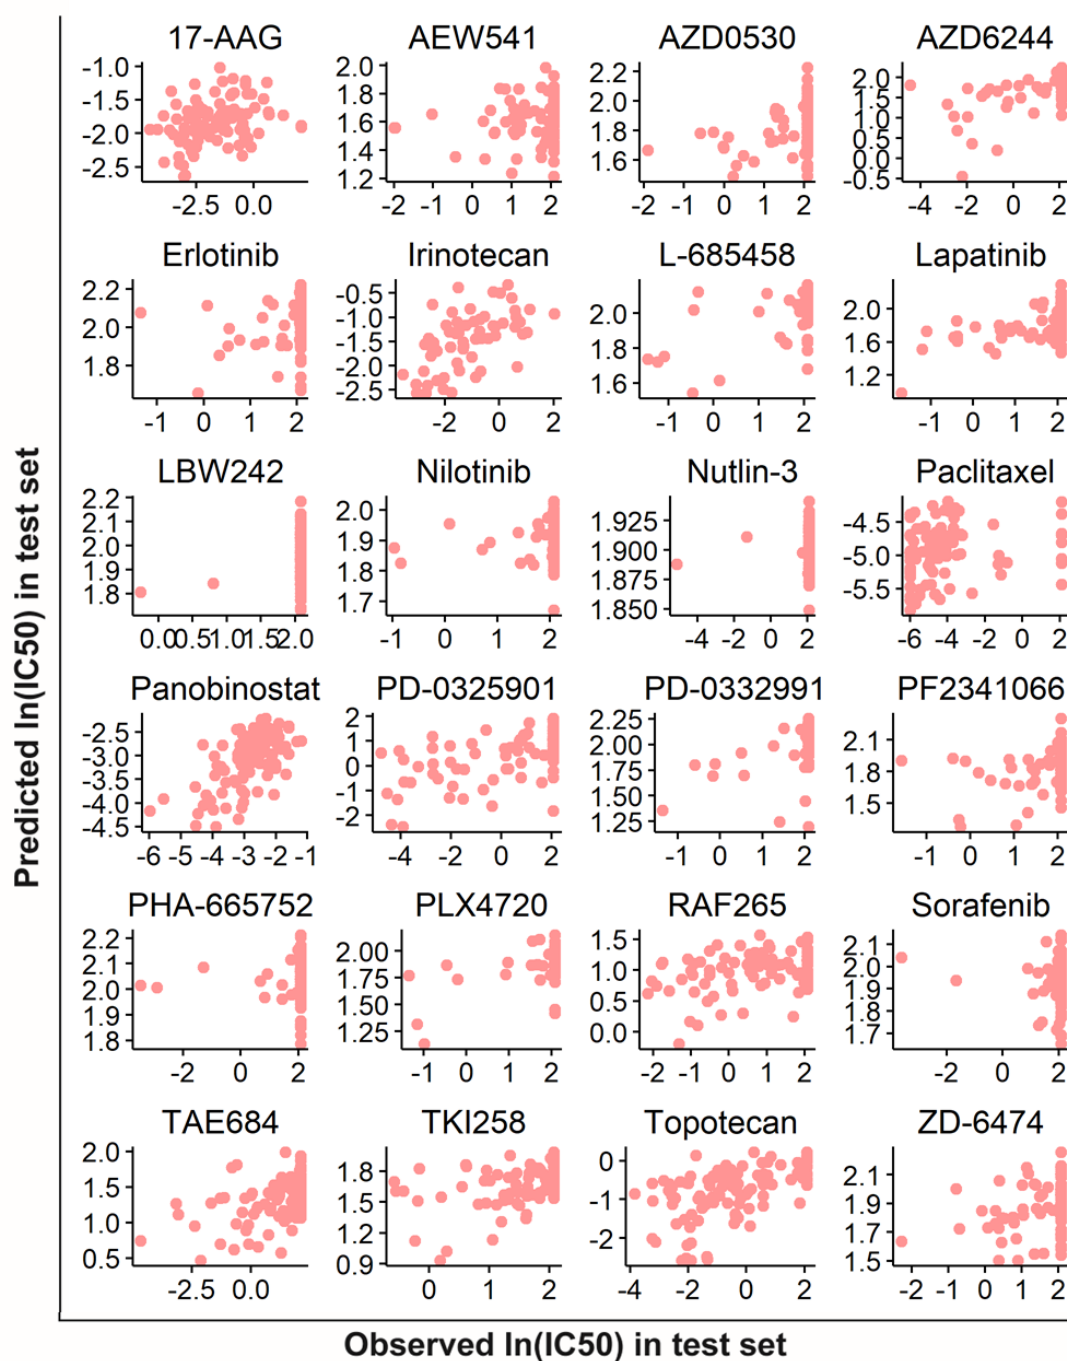



**Supplementary Figure S10. Feature selection result of the ridge (panobinostat) model and CNN model.** Performances of the panobinostat ridge model and CNN model according to the number of selected features.

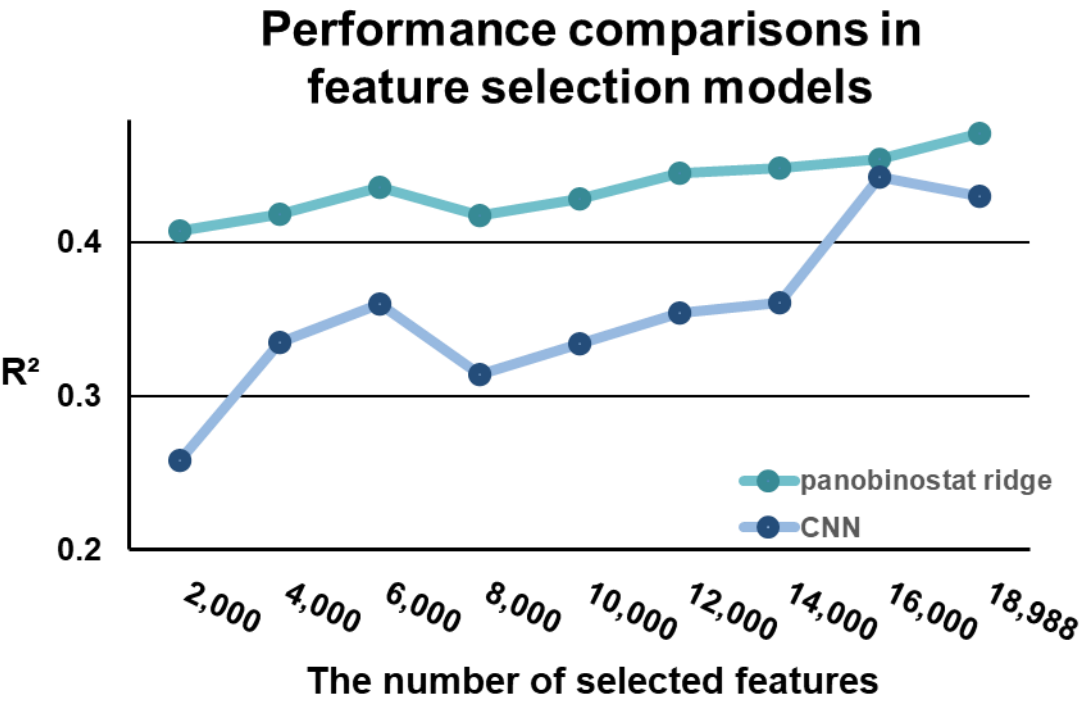

**Supplementary Figure S11. The 24 lasso models for 24 individual drugs in setting 2.** For each drug, the IC<sub>50</sub> prediction model was constructed using the MC-9K training set and was validated using the MC-9K test set.

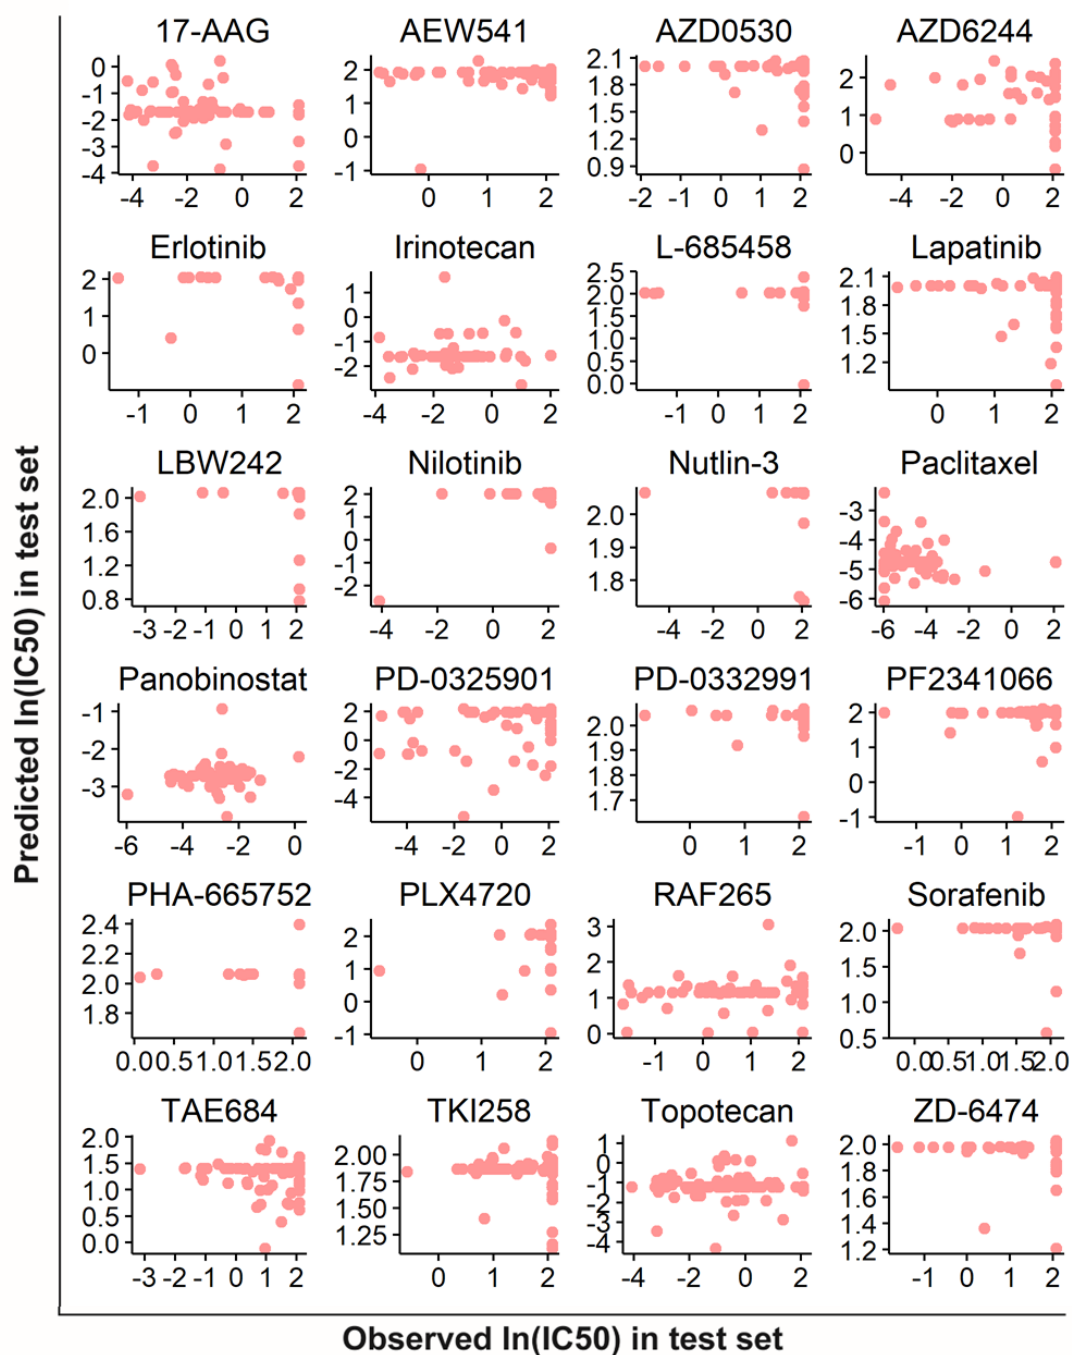

**Supplementary Figure S12. The 24 ridge models for 24 individual drugs in setting 2.** For each drug, the  $IC_{50}$  prediction model was constructed using the MC-9K training set and was validated using the MC-9K test set.

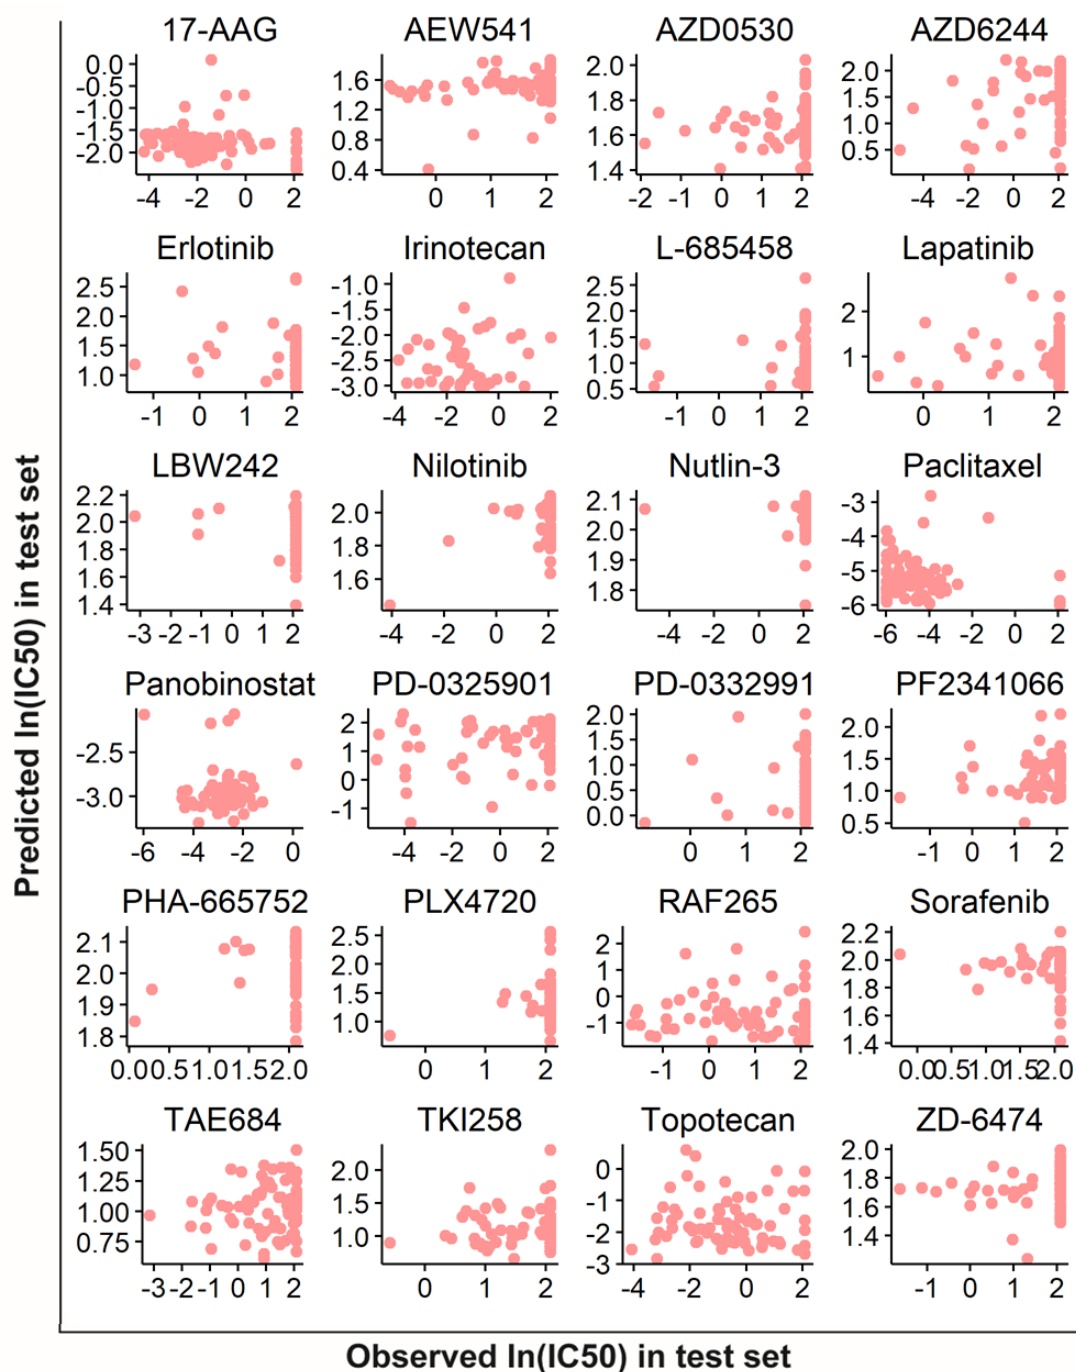

**Supplementary Figure S13. The 24 SVR models for 24 individual drugs in setting 2.** For each drug, the IC<sub>50</sub> prediction model was constructed using the MC-9K training set and was validated using the MC-9K test set.

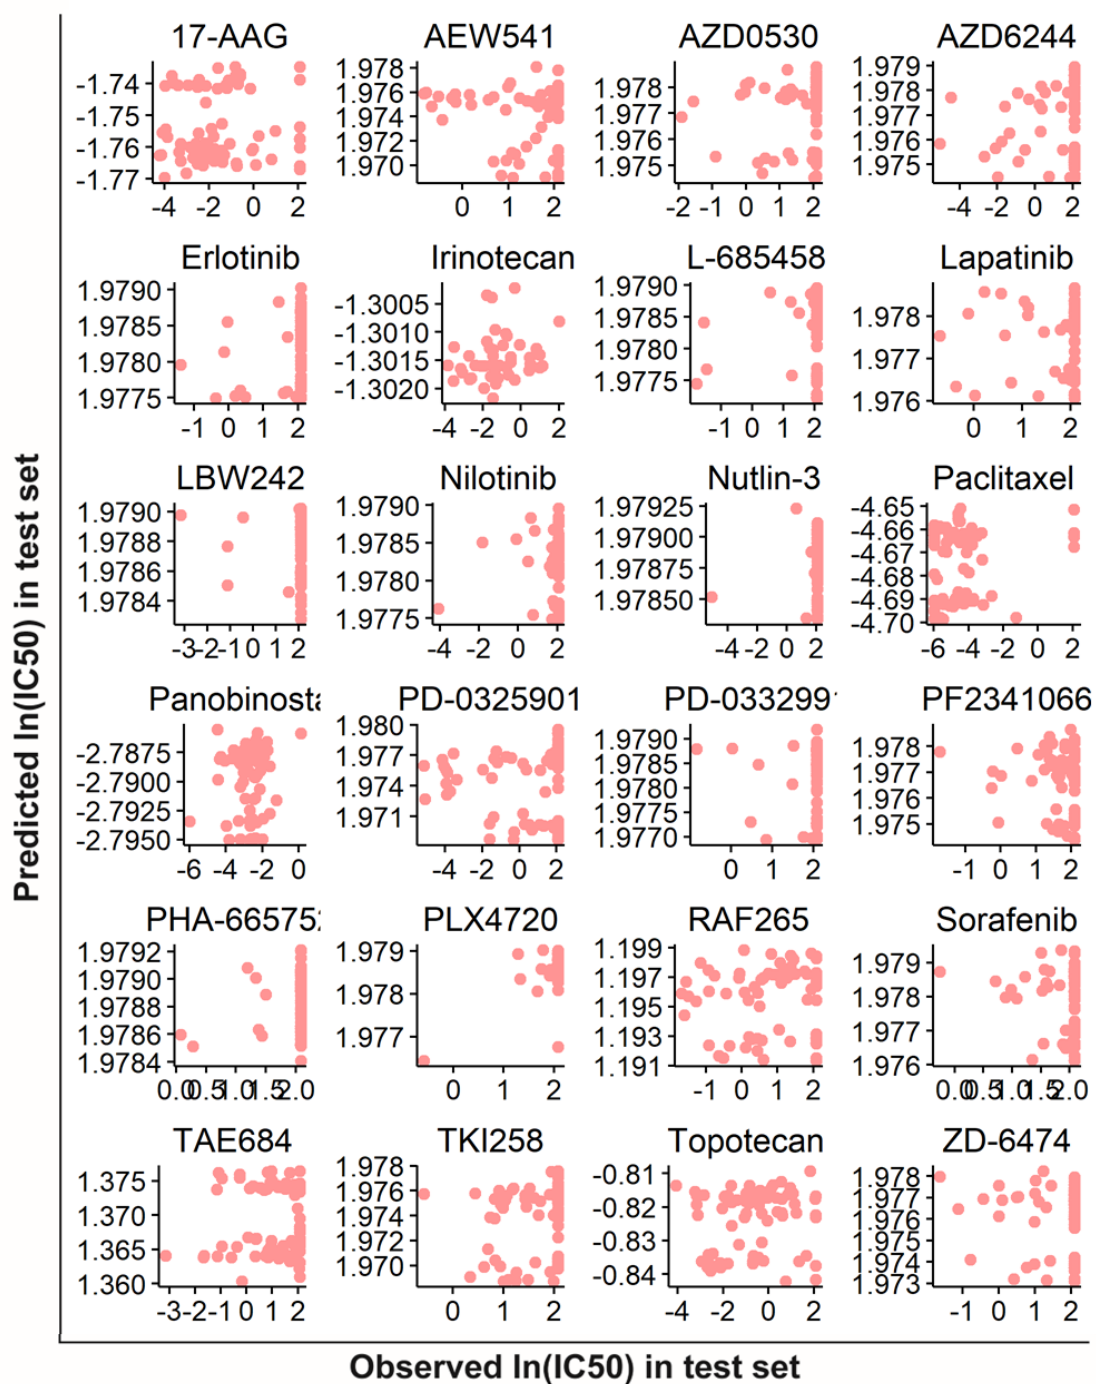

**Supplementary Figure S14. The 24 random forest models for 24 individual drugs in setting 2.** For each drug, the IC<sub>50</sub> prediction model was constructed using the MC-9K training set and was validated using the MC-9K test set.

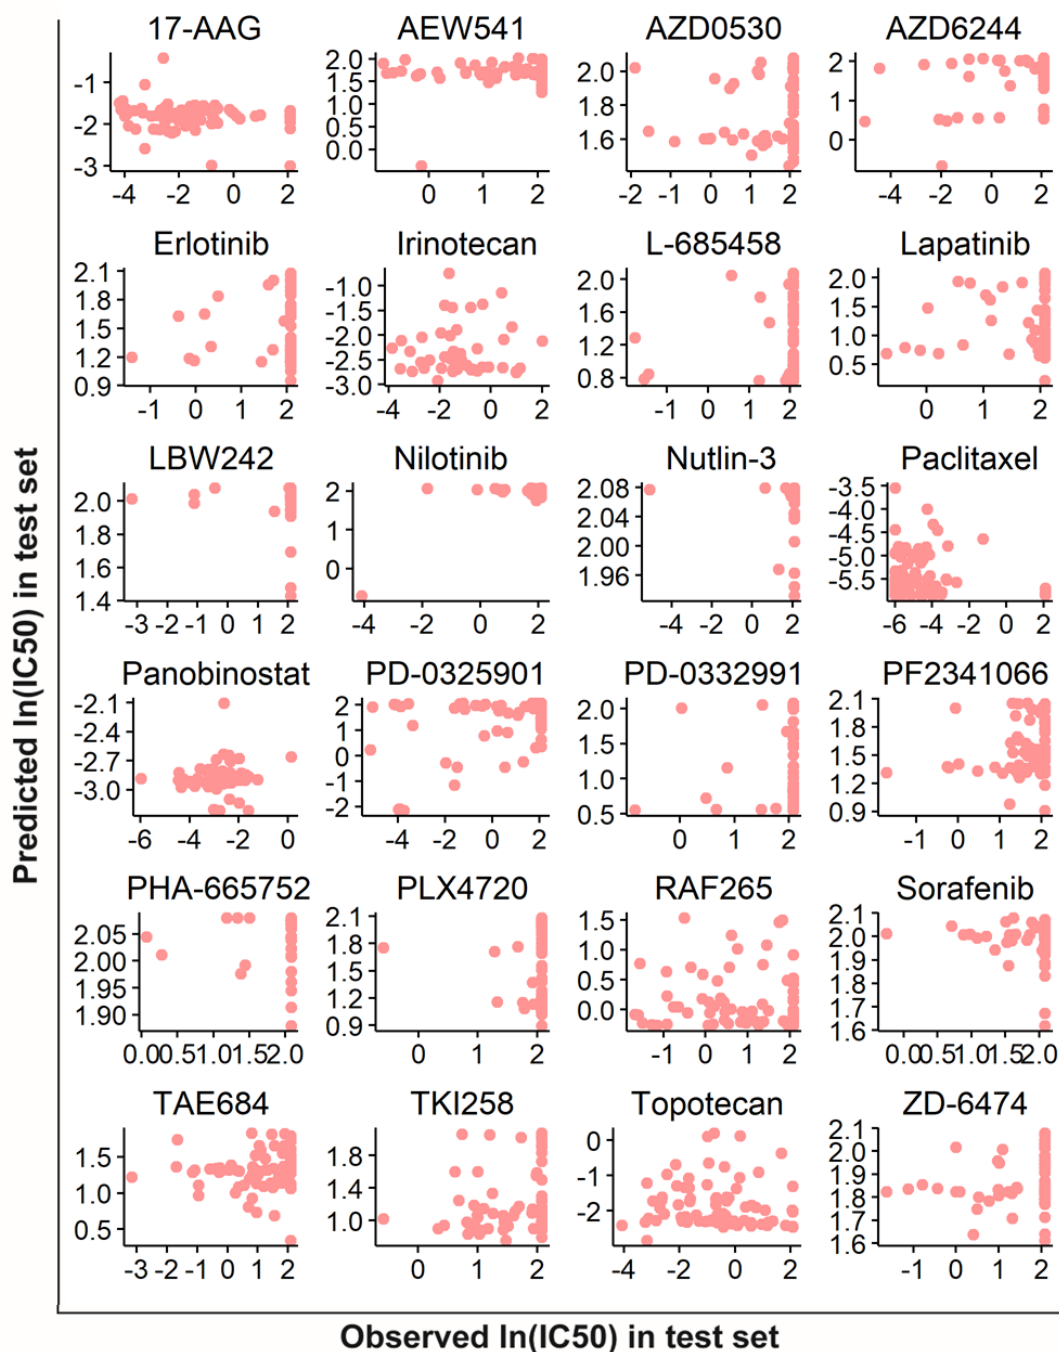

**Supplementary Figure S15. The 24 XGBoost models for 24 individual drugs in setting 2.** For each drug, the IC<sub>50</sub> prediction model was constructed using the MC-9K training set and was validated using the MC-9K test set.

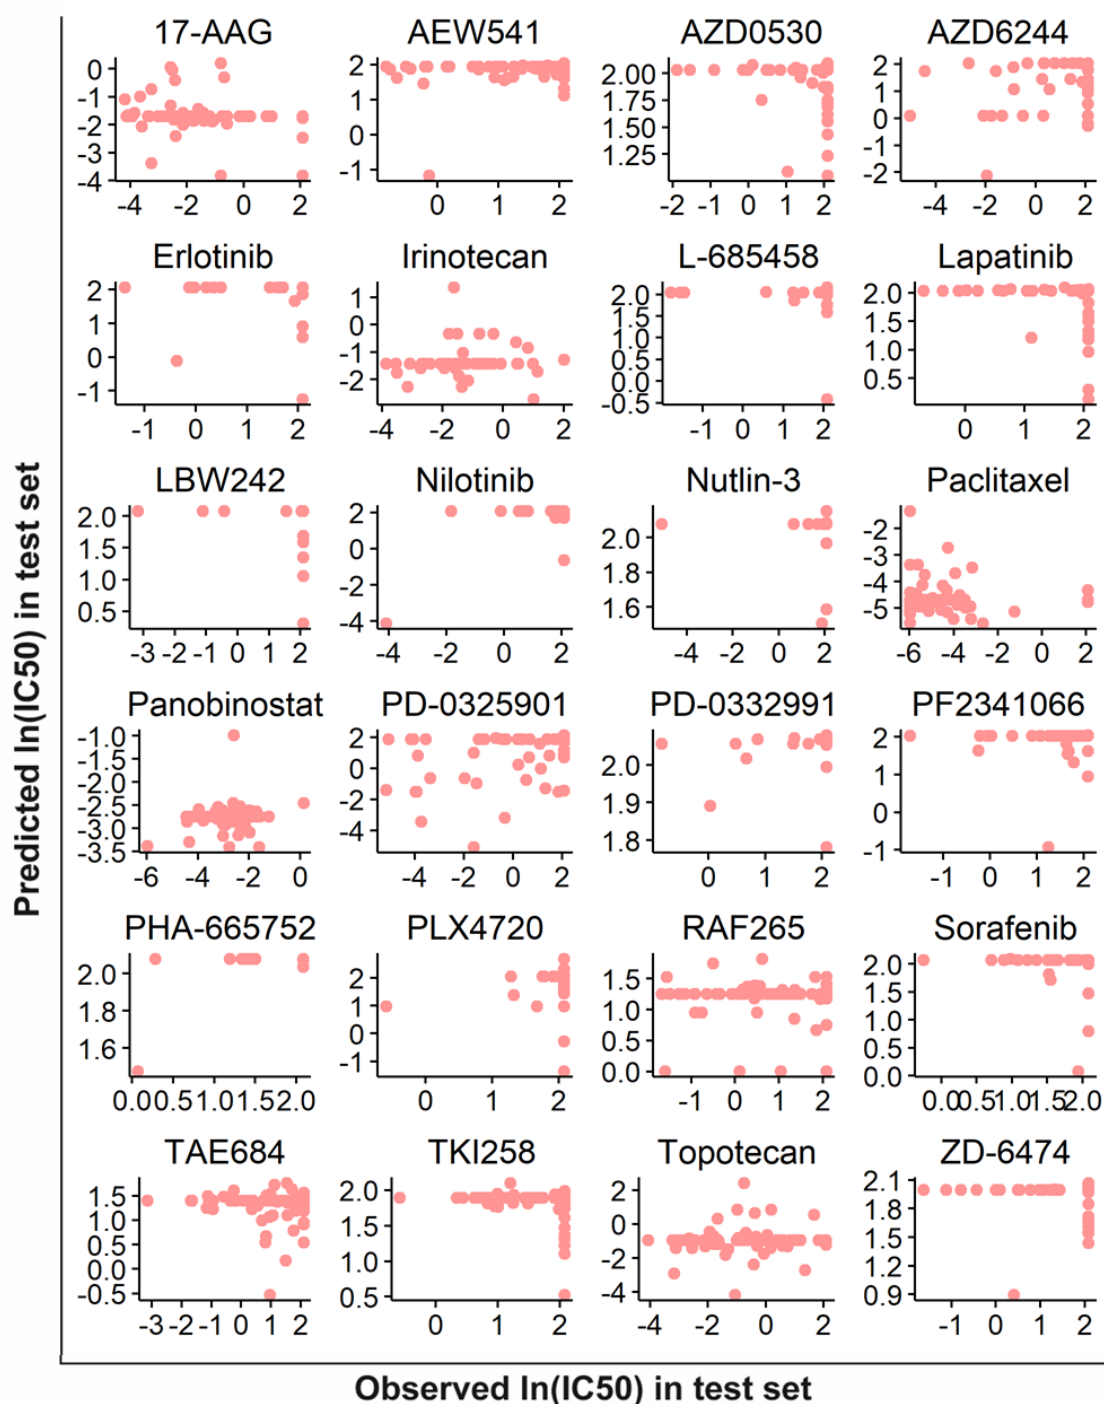

**Supplementary Figure S16. The 24 ElasticNet models for 24 individual drugs in setting 2.** For each drug, the IC<sub>50</sub> prediction model was constructed using the MC-9K training set and was validated using the MC-9K test set.

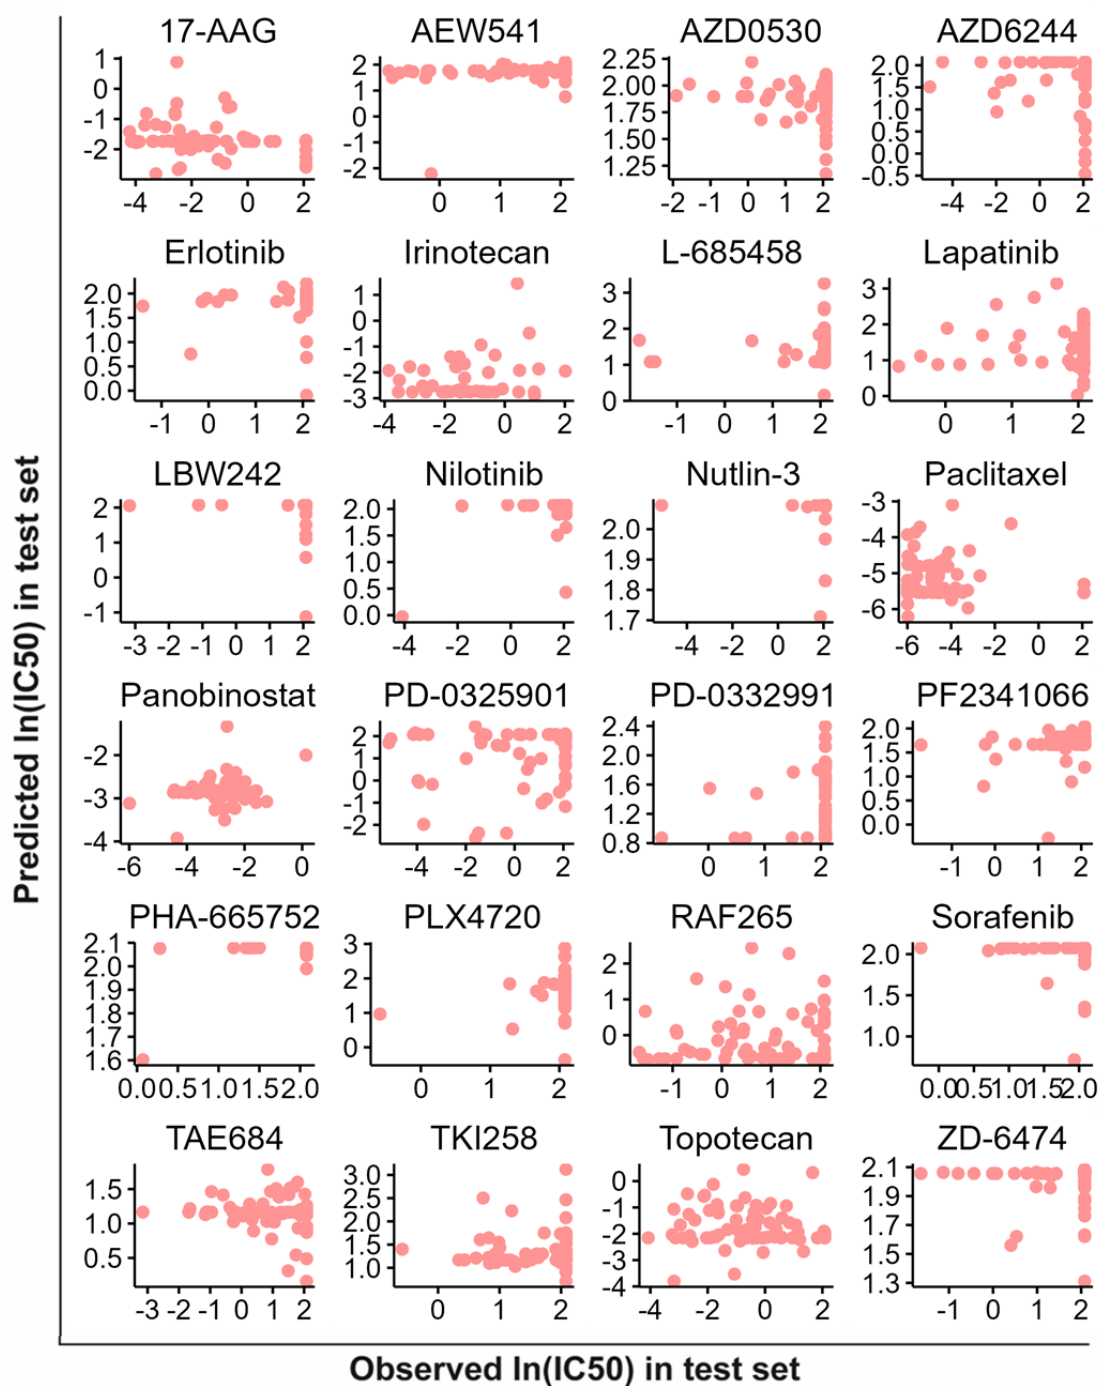



**Supplementary Figure S17. The 24 ResNet models for 24 individual drugs in setting 2.** For each drug, the IC<sub>50</sub> prediction model was constructed using the MC-9K training set and was validated using the MC-9K test set.

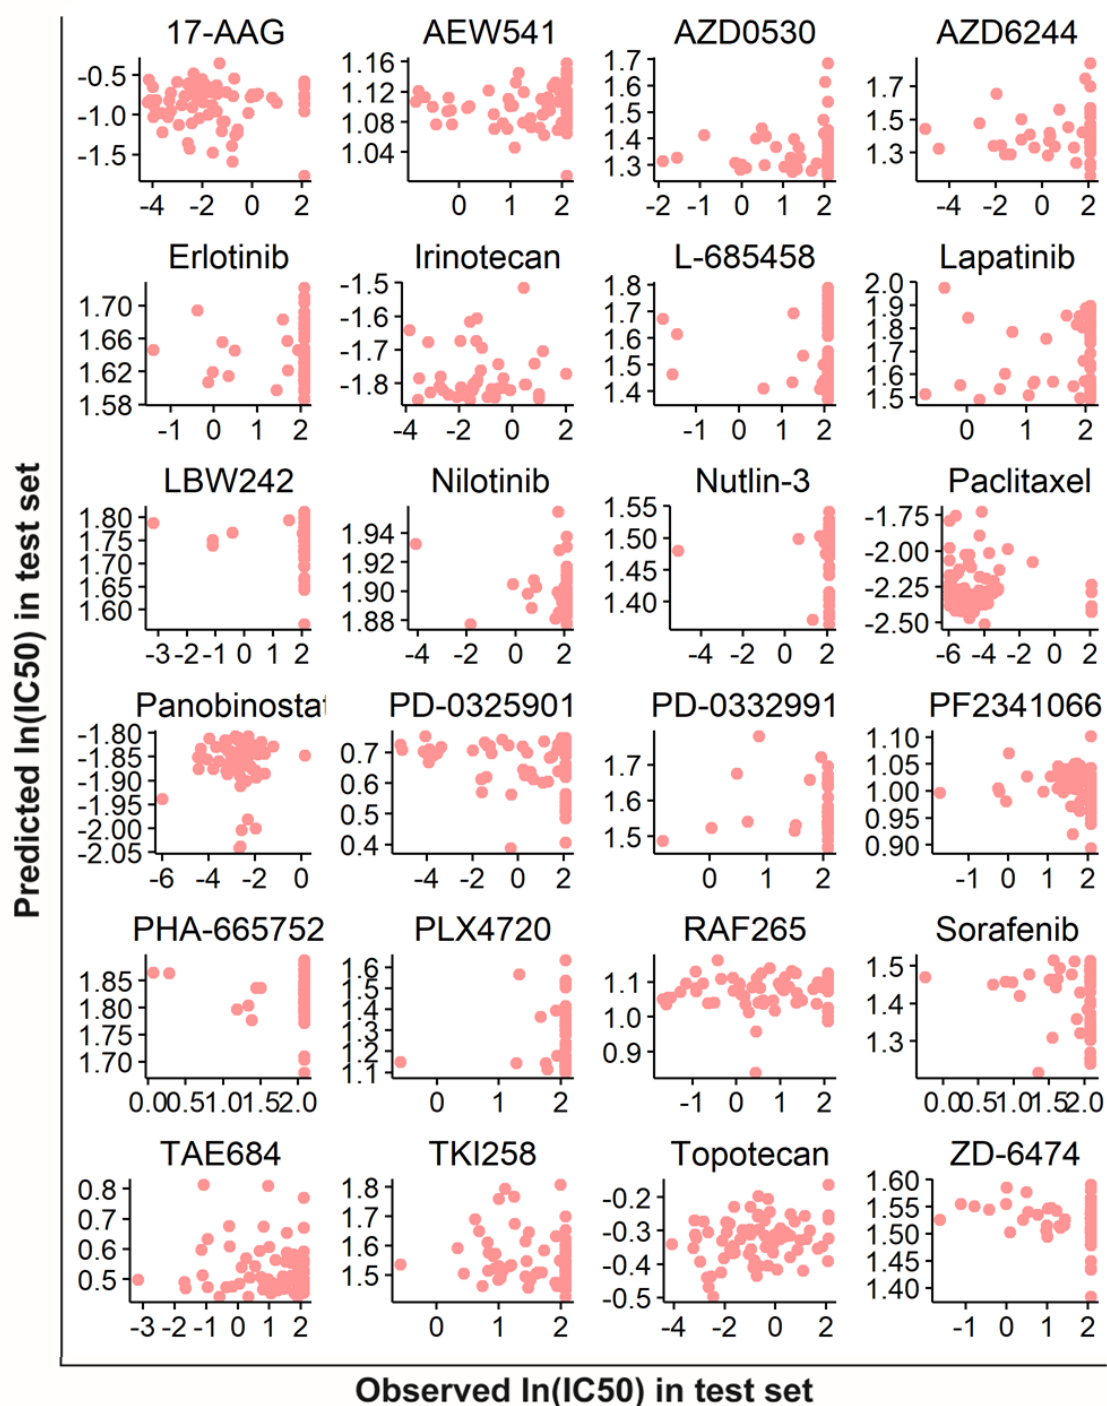



**Supplementary Figure S18. The 24 CNN models for 24 individual drugs in setting 2.** For each drug, the IC<sub>50</sub> prediction model was constructed using the MC-9K training set and was validated using the MC-9K test set.

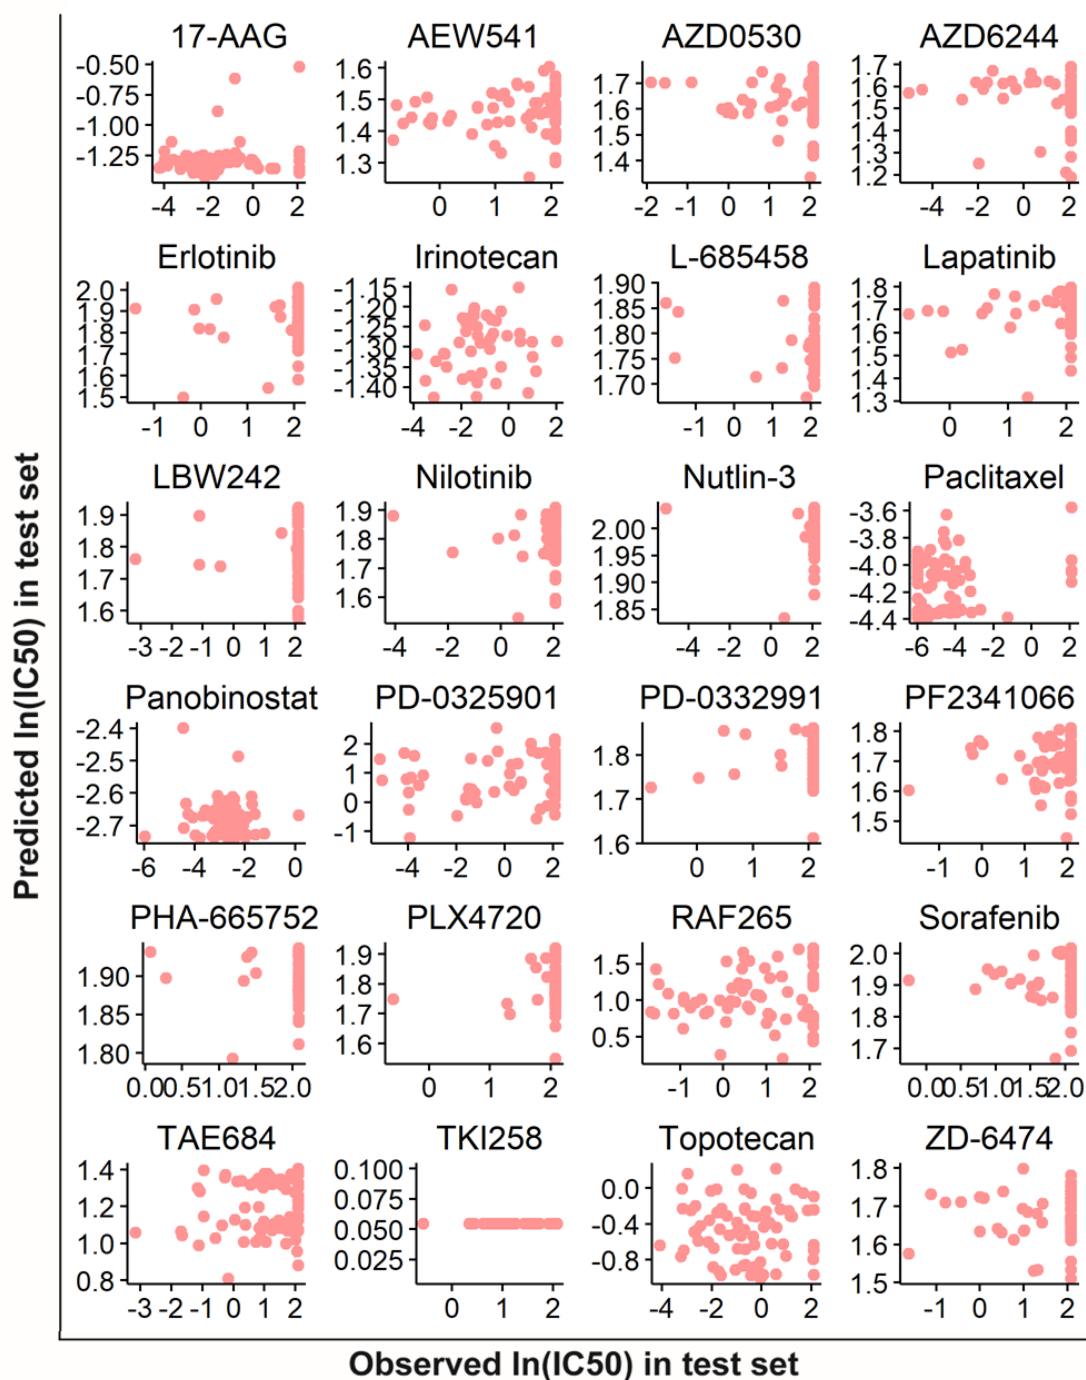

**Supplementary Figure S19. Comparison between gene features selected by XAI and those in the ridge (panobinostat) model.** For case A through D (Figure 4f through 4i), 100 gene features were selected for each case using XAI, and we obtained 374 non-redundant gene features. We also selected top 100 important gene features from the panobinostat ridge model. We compared the two sets of selected features by the two methods.

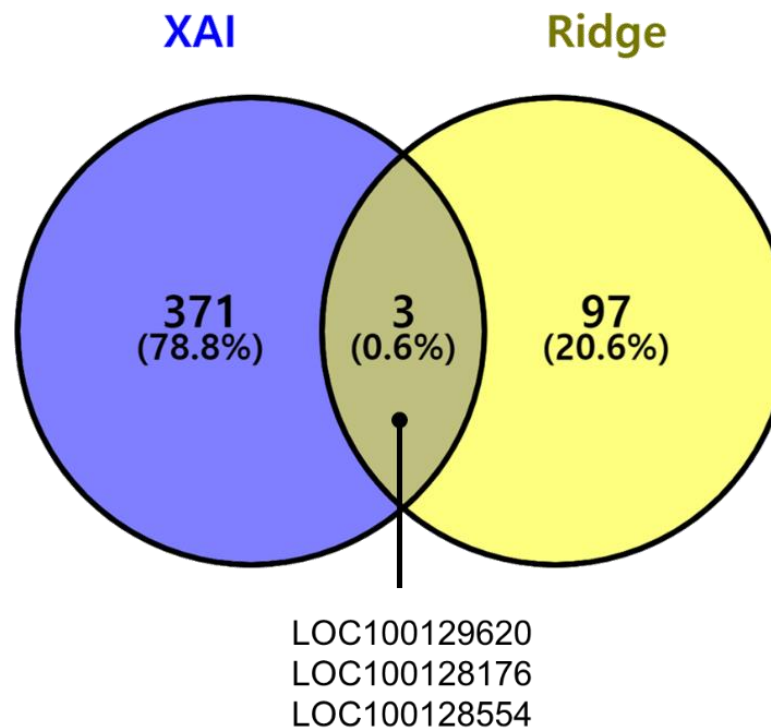

**Supplementary Figure S20. Application of XAI analysis to CNN model in the four cases.** To identify major genes affecting the CNN model, we performed XAI analysis with the four cases (cases A through D). The six genes affecting drug sensitivity (red bar) and drug resistance (blue bar) were detected in **(a)** case A, **(b)** case B, **(c)** case C, and **(d)** case D, respectively.

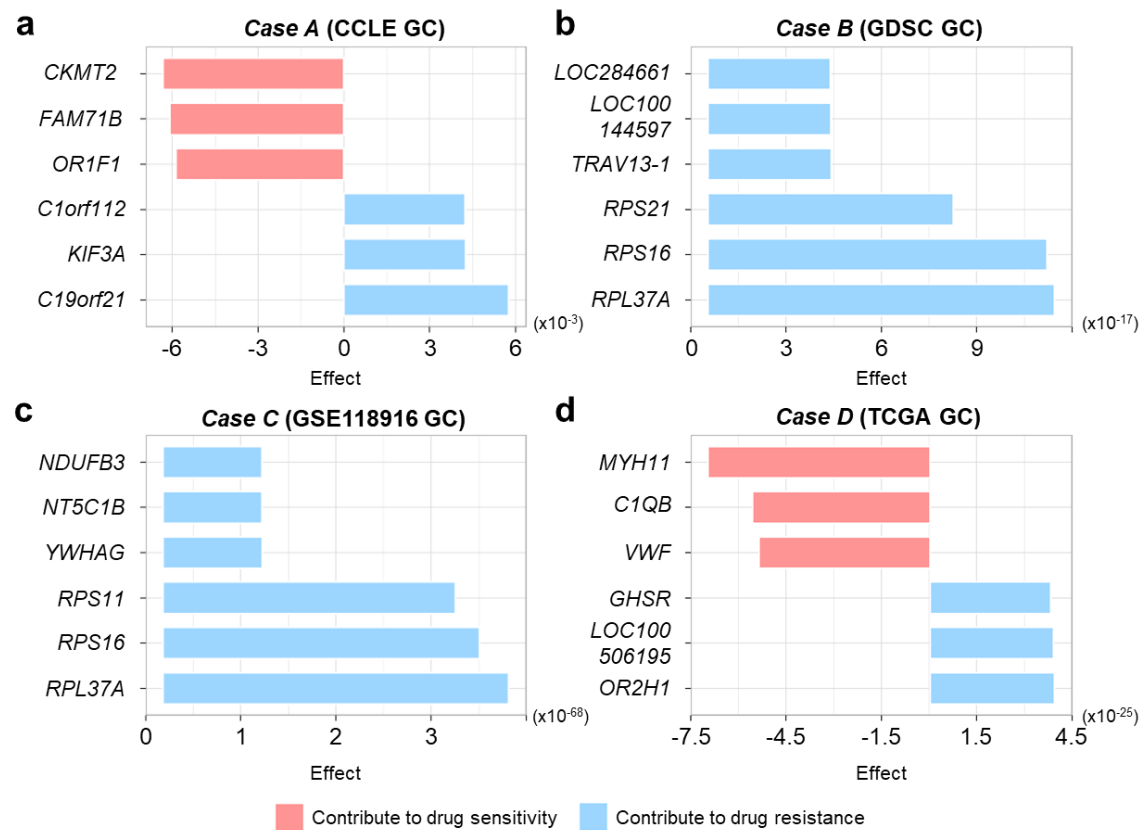

**Supplementary Figure S21. CNN structure.** Grey boxes represent convolution and fully-connected layers. Cell line genomics vector (e.g., gene expression or mutation) was assigned in the first layer.

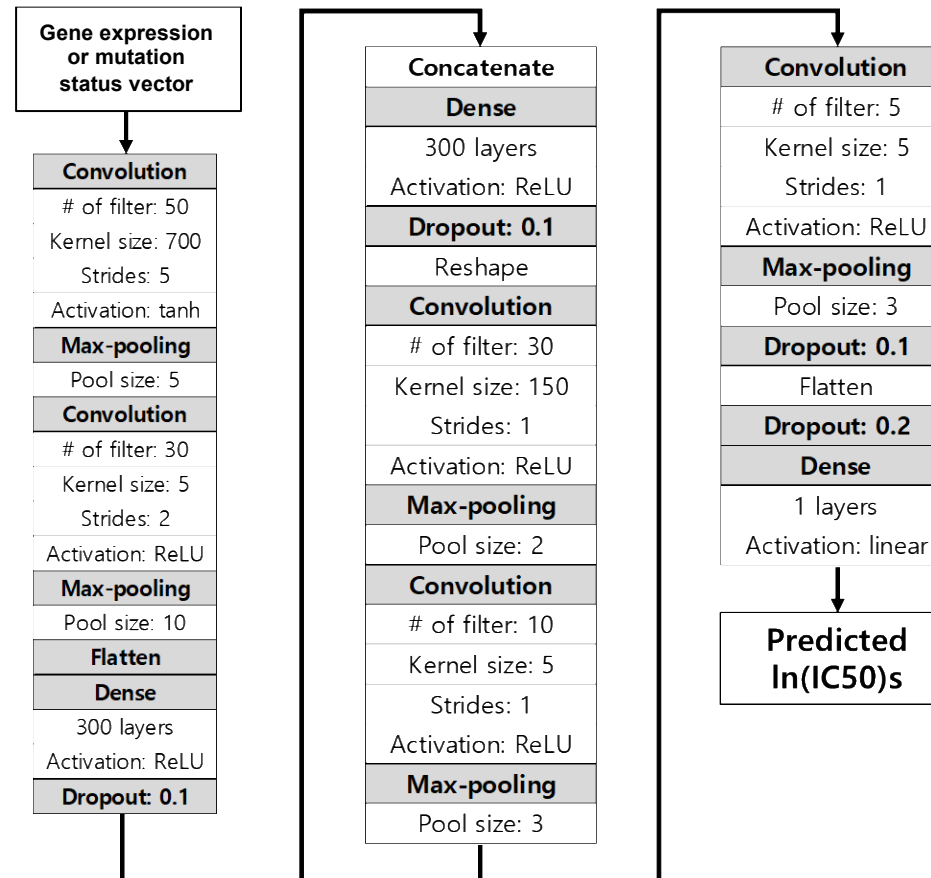

**Supplementary Figure S22. ResNet architecture.** Grey boxes represent convolution and fully-connected layers. The genomics vector (e.g., gene expression or mutation) was used as the input layer. Skip connections are indicated as blue arrows.

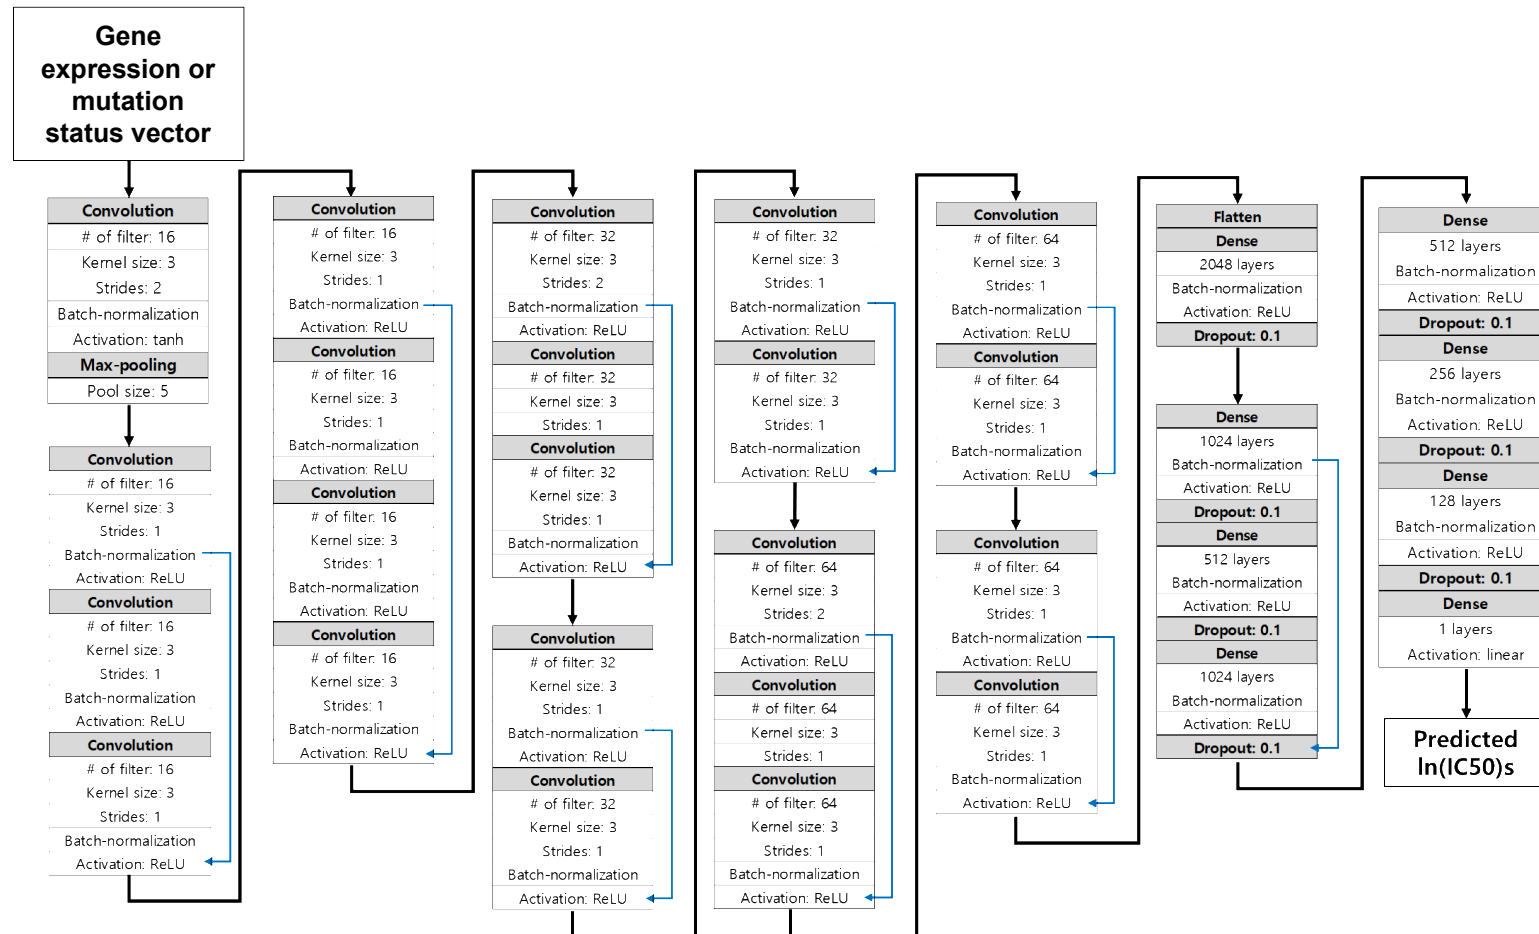

## Supplementary References

- 1      Yang, W. *et al.* Genomics of Drug Sensitivity in Cancer (GDSC): a resource for therapeutic biomarker discovery in cancer cells. *Nucleic acids research* **41**, D955-961, doi:10.1093/nar/gks1111 (2013).
- 2      Barretina, J. *et al.* The Cancer Cell Line Encyclopedia enables predictive modelling of anticancer drug sensitivity. *Nature* **483**, 603-607, doi:10.1038/nature11003 (2012).
